# Supplementary material for: Recognition of mixed-sequence DNA using double-stranded probes with interstrand zipper arrangements of O2′-triphenylene- and coronene-functionalized RNA monomers
Source: Royal Society of Chemistry journal article supplement (doi:10.1039/c7ob01920c), 2017-01-01

**Recognition of mixed-sequence DNA using double-stranded probes with interstrand zipper arrangements of O2'-triphenylene- and coronene-functionalized RNA monomers**

Saswata Karmakar,<sup>a</sup> Dale C. Guenther,<sup>a</sup> Bradley C. Gibbons,<sup>a,b</sup> and Patrick J. Hrdlicka<sup>\*a</sup>

<sup>a</sup>Department of Chemistry, University of Idaho, Moscow, ID-83844, USA

<sup>b</sup>Department of Chemistry, Brigham Young University-Idaho, ID-83440, USA

\*Corresponding author: Ph: (+1) 208 885 0108. Fax: (+1) 208 885 6173. Email: [hrdlicka@uidaho.edu](mailto:hrdlicka@uidaho.edu)

**ELECTRONIC SUPPLEMENTARY INFORMATION**

|                                                                                                                         |     |
|-------------------------------------------------------------------------------------------------------------------------|-----|
| General experimental section                                                                                            | S2  |
| MALDI-MS of modified oligonucleotides (Table S1)                                                                        | S3  |
| Representative thermal denaturation curves of X-modified duplexes (Fig. S1)                                             | S4  |
| DNA-selectivity of <b>B1-B6</b> (Table S2)                                                                              | S4  |
| RNA mismatch discrimination of X-modified ONs (Table S3)                                                                | S5  |
| Steady-state fluorescence emission spectra of X-modified ONs and duplexes (Fig. S2)                                     | S6  |
| Enthalpy/Entropy trends of double-stranded probes with interstrand zippers of <b>X/Y/Z</b> -monomers (Tables S4 and S5) | S7  |
| References                                                                                                              | S10 |
| <sup>1</sup> H, COSY, <sup>13</sup> C, DEPT, and HSQC spectra of <b>2X</b> , <b>3X</b> and <b>4X</b>                    | S11 |

## General experimental section.

Reagents and solvents were of analytical grade and used as received from vendors unless otherwise specified. Petroleum ether of the distillation range 60-80 °C was used. Solvents were dried over activated molecular sieves: acetonitrile and THF (3Å); CH<sub>2</sub>Cl<sub>2</sub>, 1,2-dichloroethane, *N,N'*-diisopropylethylamine and anhydrous DMSO (4Å). The water content of anhydrous solvents was verified on Karl-Fisher apparatus. Reactions were monitored by TLC using silica gel coated plates with a fluorescence indicator (SiO<sub>2</sub>-60, F-254) which were visualized a) under UV light and b) by dipping in 5% conc. H<sub>2</sub>SO<sub>4</sub> in absolute ethanol (v/v) followed by heating. Silica gel column chromatography was performed with Silica gel 60 (particle size 0.040–0.063 mm) using moderate pressure (pressure ball). Evaporation of solvents was carried out under reduced pressure at temperatures below 45 °C. Following column chromatography, appropriate fractions were pooled, evaporated and dried at high vacuum for at least 12 h to give the obtained products in high purity (>95%) as ascertained by 1D NMR techniques. Chemical shifts of <sup>1</sup>H NMR (500 MHz), <sup>13</sup>C NMR (125.6 MHz), and <sup>31</sup>P NMR (121.5 MHz) are reported relative to deuterated solvent or other internal standards (80% phosphoric acid for <sup>31</sup>P NMR). Exchangeable (ex) protons were detected by the disappearance of signals upon D<sub>2</sub>O addition. Assignments of NMR spectra are based on 2D spectra (COSY, HSQC) and DEPT-spectra. Quaternary carbons are not assigned in <sup>13</sup>C NMR, but their presence is verified from HSQC and DEPT spectra (absence of signals). MALDI-HRMS spectra of compounds were recorded on a Waters Q-TOF Premiere mass spectrometer using 2,5-dihydroxybenzoic acid as a matrix and polyethylene glycol (PEG 600) as an internal calibration standard.

**Table S1.** MALDI-MS of ONs modified with monomer **X**.<sup>a</sup>

| ONs       | Sequence                       | Calc. $m/z$ [M+H] | Found $m/z$ [M+H] |
|-----------|--------------------------------|-------------------|-------------------|
| <b>X1</b> | 5'-G <u>X</u> G ATA TGC        | 2996              | 2996              |
| <b>X2</b> | 5'-GTG A <u>X</u> A TGC        | 2996              | 2996              |
| <b>X3</b> | 5'-GTG ATA <u>X</u> GC         | 2996              | 2996              |
| <b>X4</b> | 3'-CAC <u>X</u> AT ACG         | 2924              | 2925              |
| <b>X5</b> | 3'-CAC TA <u>X</u> ACG         | 2925              | 2925              |
| <b>X6</b> | 3'-CAC <u>X</u> A <u>X</u> ACG | 3167              | 3167              |

<sup>a</sup> For the structure of monomer **X**, see Figure 1 in the main manuscript.

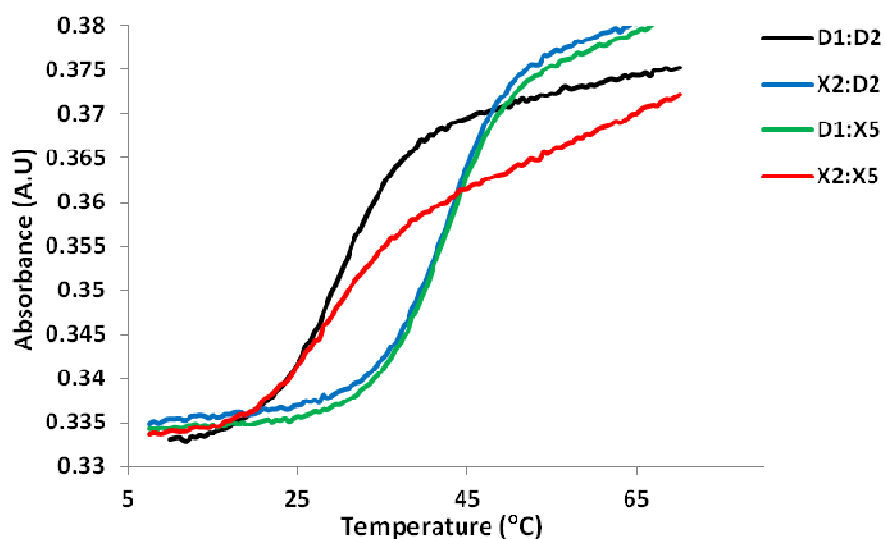

**Figure S1.** Representative thermal denaturation curves of **X**-modified duplexes and reference duplex **D1:D2**. For experimental conditions, see Table 1.

**Table S2.** DNA-selectivity of **B1-B6**.<sup>a</sup>

| ON        | Sequence                | <b>B</b> = | $\Delta\Delta T_m/\text{mod (DNA-RNA)} [^{\circ}\text{C}]$ |                       |                       |
|-----------|-------------------------|------------|------------------------------------------------------------|-----------------------|-----------------------|
|           |                         |            | <b>X</b>                                                   | <b>Y</b> <sup>b</sup> | <b>Z</b> <sup>b</sup> |
| <b>B1</b> | 5'-G <b>B</b> G ATA TGC |            | +5.0                                                       | +7.0                  | +9.5                  |
| <b>B2</b> | 5'-GTG A <b>B</b> A TGC |            | +7.5                                                       | +9.0                  | +9.0                  |
| <b>B3</b> | 5'-GTG ATA <b>B</b> GC  |            | +8.0                                                       | +8.0                  | +7.0                  |
| <b>B4</b> | 3'-CAC <b>B</b> AT ACG  |            | +7.0                                                       | +8.0                  | +8.5                  |
| <b>B5</b> | 3'-CAC TA <b>B</b> ACG  |            | +6.0                                                       | +10.5                 | +10.0                 |
| <b>B6</b> | 3'-CAC <b>BAB</b> ACG   |            | +7.0                                                       | +7.3                  | +15.6                 |

<sup>a</sup> DNA selectivity defined as  $\Delta\Delta T_m/\text{mod (DNA-RNA)} = \Delta T_m/\text{mod (vs DNA)} - \Delta T_m/\text{mod (vs RNA)}$ . <sup>b</sup> Data from reference S1 are included to facilitate comparison.

*RNA mismatch discrimination of X-modified ONs.*

Triphenylene-functionalized **X2** displays relatively efficient discrimination of mismatched RNA targets, regardless of the nature of the mismatched nucleotide opposite of monomer **X** (Table S3). The RNA mismatch discrimination characteristics of **X2** resemble those of the coronene-functionalized **Z2**, in particularly the ability to efficiently discriminate the wobble base pair with G. The pyrene-functionalized **Y2**, conversely, displays inefficient discrimination of the wobble pair.

**Table S3.** Discrimination of mismatched RNA targets by **X2/Y2/Z2** and reference strands.<sup>a</sup>

| ON                    | Sequence                | <b>B</b> = | RNA: 3'-CAC <b>T</b> <u>B</u> T ACG |                   |       |        |
|-----------------------|-------------------------|------------|-------------------------------------|-------------------|-------|--------|
|                       |                         |            | $T_m$ [°C]                          | $\Delta T_m$ [°C] |       |        |
|                       |                         |            | A                                   | C                 | G     | U      |
| <b>D1</b>             | 5'-GTG ATA TGC          |            | <b>26.5</b>                         | <-16.5            | -4.5  | <-16.5 |
| <b>X2</b>             | 5'-GTG A <u>X</u> A TGC |            | <b>32.0</b>                         | -13.0             | -10.0 | -11.0  |
| <b>Y2<sup>b</sup></b> | 5'-GTG A <u>Y</u> A TGC |            | <b>31.0</b>                         | -17.5             | -3.5  | -9.5   |
| <b>Z2<sup>b</sup></b> | 5'-GTG A <u>Z</u> A TGC |            | <b>37.0</b>                         | -12.0             | -9.0  | -13.0  |

<sup>a</sup> For conditions of thermal denaturation experiments, see Table 1.  $T_m$ 's of fully matched duplexes are shown in bold.  $\Delta T_m$  = change in  $T_m$  relative to fully matched DNA:RNA duplex. <sup>b</sup> Data from reference S1 are included to facilitate comparison.

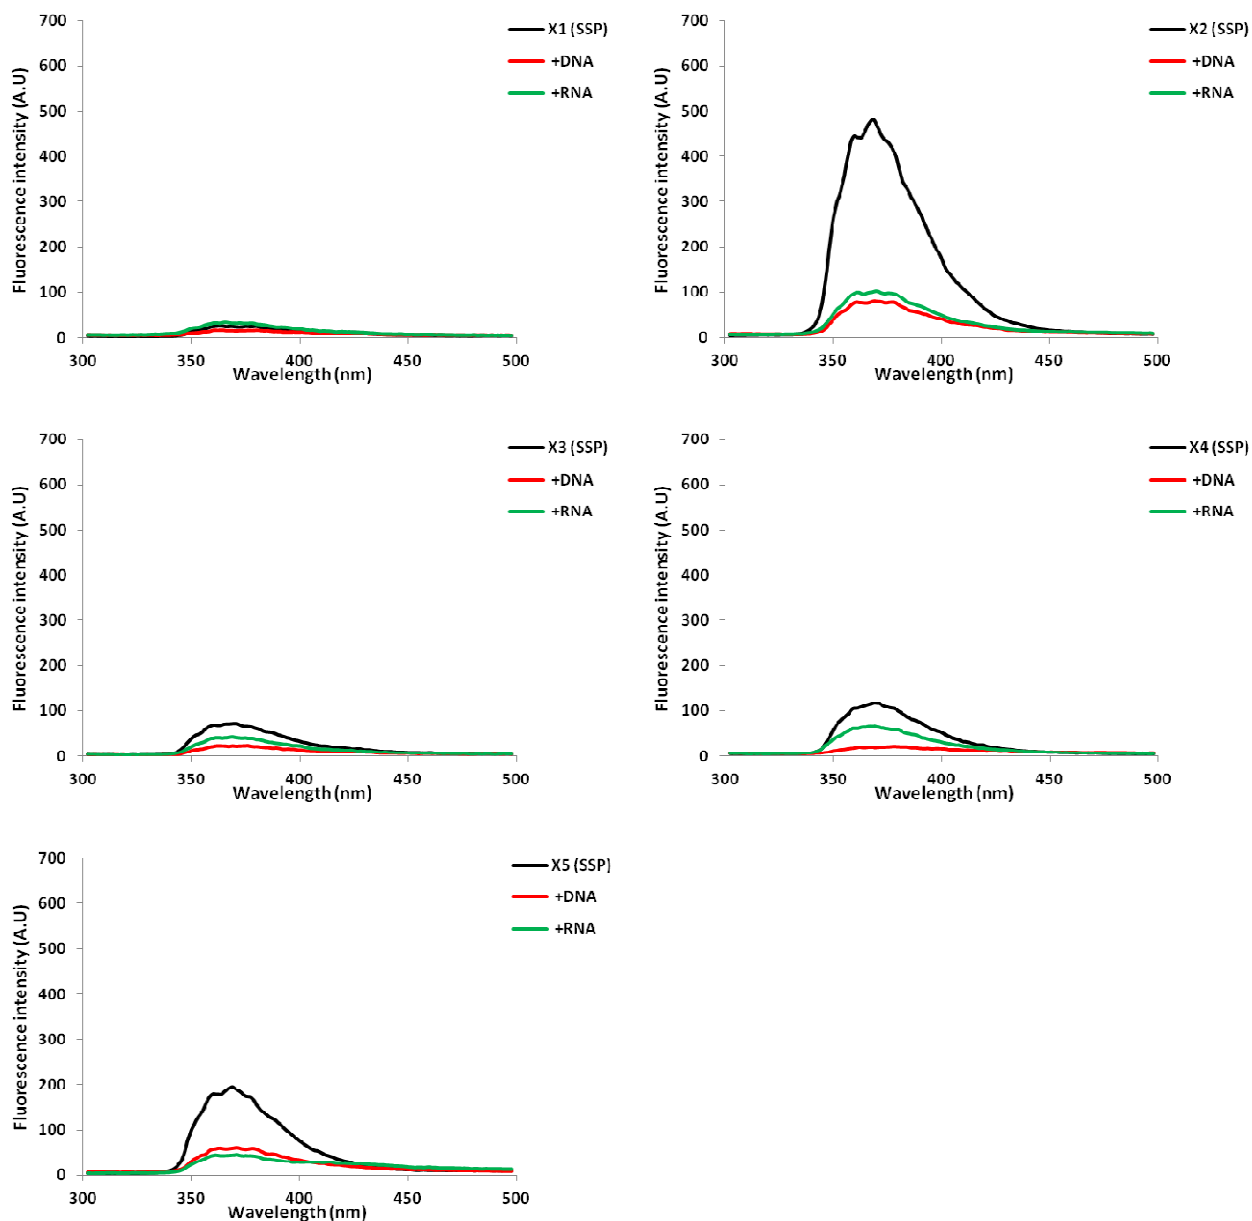

**Figure S2.** Steady-state fluorescence emission spectra of **X**-modified ONs and their corresponding duplexes with DNA/RNA targets. Spectra were recorded at  $T = 5\text{ }^{\circ}\text{C}$  using  $\lambda_{\text{ex}} = 260\text{ nm}$  and each strand at  $1.0\text{ }\mu\text{M}$  concentration in  $T_{\text{m}}$  buffer. SSP = single-stranded probe.

*Enthalpy/Entropy trends of double-stranded probes with interstrand zippers of X/Y/Z-monomers.*

As is expected for the formation of nucleic acid duplexes, highly favorable enthalpy and highly unfavorable entropy contributions are observed for unmodified and modified duplexes. The *relative* stabilization brought about upon incorporation of triphenylene-functionalized monomer **X** into ONs is generally enthalpic in nature, although being entropic in nature for **X3** (note the negative values in the first two  $\Delta\Delta H$  columns, Table S4, and the positive values in the first two  $\Delta(T_{293}\Delta S)$  columns, Table S5). In contrast, the relative stabilization provided by pyrene-functionalized monomer **Y** is entropic in nature, whereas the stabilization conferred by coronene-functionalized monomer **Z** is either enthalpic or entropic in nature, depending on the sequence context. The **X/Y/Z**-monomers confer an unfavorable enthalpic contribution in essentially all of the probe duplexes (note the positive values in the third  $\Delta\Delta H$  column, Table S4). As a consequence, the thermodynamic driving force for dsDNA-recognition by **B2:B5** probes is due to a major decrease in enthalpy (compare  $\Delta H_{\text{rec}}$  and  $-T^{293}\Delta S_{\text{rec}}$  values for **B2:B5** probes, Tables S4 and S5).

**Table S4.** Enthalpy change upon duplex formation ( $\Delta H$ ) and probe recognition of isosequential dsDNA target **D1:D2** ( $\Delta H_{\text{rec}}$ ).<sup>a</sup>

| ON                                  | ZP        | Sequence                                           | $\Delta H$ [ $\Delta\Delta H$ ] (kJ/mol) |                     |                     | $\Delta H_{\text{rec}}$<br>(kJ/mol) |
|-------------------------------------|-----------|----------------------------------------------------|------------------------------------------|---------------------|---------------------|-------------------------------------|
|                                     |           |                                                    | upper ON<br>vs cDNA                      | lower ON<br>vs cDNA | probe<br>duplex     |                                     |
| <b>X1</b><br><b>X5</b>              | <b>+4</b> | 5'-G <u>X</u> G ATA TGC<br>3'-CAC TAY <u>X</u> ACG | -305±2 [+1]                              | -359±3 [-53]        | -274±2 [+32]        | -84                                 |
| <b>X1</b><br><b>X4</b>              | <b>+2</b> | 5'-G <u>X</u> G ATA TGC<br>3'-CAC <u>X</u> AT ACG  | -305±2 [+1]                              | -319±3 [-13]        | -262±1 [+44]        | -56                                 |
| <b>X2</b><br><b>X5</b>              | <b>+1</b> | 5'-GTG A <u>X</u> A TGC<br>3'-CAC TAY <u>X</u> ACG | <b>-360±2 [-54]</b>                      | <b>-359±3 [-53]</b> | <b>-266±2 [+40]</b> | <b>-147</b>                         |
| <b>X2</b><br><b>X4</b>              | <b>-1</b> | 5'-GTG A <u>X</u> A TGC<br>3'-CAC <u>X</u> AT ACG  | -360±2 [-54]                             | -319±3 [-13]        | -284±4 [+22]        | -89                                 |
| <b>X3</b><br><b>X5</b>              | <b>-1</b> | 5'-GTG ATA <u>X</u> GC<br>3'-CAC TAY <u>X</u> ACG  | -278±3 [+28]                             | -359±3 [-53]        | -225±7 [+81]        | -106                                |
| <b>X3</b><br><b>X4</b>              | <b>-3</b> | 5'-GTG ATA <u>X</u> GC<br>3'-CAC <u>X</u> AT ACG   | -278±3 [+28]                             | -319±3 [-13]        | -306±5 [±0]         | +15                                 |
| <sup>b</sup> <b>Y1</b><br><b>Y5</b> | <b>+4</b> | 5'-G <u>Y</u> G ATA TGC<br>3'-CAC TAY <u>Y</u> ACG | -281±4 [+25]                             | -299±2 [+7]         | -279±1 [+27]        | +5                                  |
| <sup>b</sup> <b>Y1</b><br><b>Y4</b> | <b>+2</b> | 5'-G <u>Y</u> G ATA TGC<br>3'-CAC <u>Y</u> AT ACG  | -281±4 [+25]                             | -300±7 [+6]         | -248±8 [+58]        | -27                                 |
| <sup>b</sup> <b>Y2</b><br><b>Y5</b> | <b>+1</b> | 5'-GTG A <u>Y</u> A TGC<br>3'-CAC TAY <u>Y</u> ACG | <b>-305±1 [+1]</b>                       | <b>-299±2 [+7]</b>  | <b>-244±3 [+62]</b> | <b>-54</b>                          |
| <sup>b</sup> <b>Y2</b><br><b>Y4</b> | <b>-1</b> | 5'-GTG A <u>Y</u> A TGC<br>3'-CAC <u>Y</u> AT ACG  | -305±1 [+1]                              | -300±7 [+6]         | -296±6 [+10]        | -3                                  |
| <sup>b</sup> <b>Y3</b><br><b>Y5</b> | <b>-1</b> | 5'-GTG ATA <u>Y</u> GC<br>3'-CAC TAY <u>Y</u> ACG  | -270±7 [+36]                             | -299±2 [+7]         | -280±5 [+26]        | +17                                 |
| <sup>b</sup> <b>Y3</b><br><b>Y4</b> | <b>-3</b> | 5'-GTG ATA <u>Y</u> GC<br>3'-CAC <u>Y</u> AT ACG   | -270±7 [+36]                             | -300±7 [+6]         | -309±4 [-3]         | +45                                 |
| <b>Z1</b><br><b>Z5</b>              | <b>+4</b> | 5'-G <u>Z</u> G ATA TGC<br>3'-CAC TAZ <u>Z</u> ACG | -288±6 [+18]                             | -317±7 [-11]        | -198±5 [+108]       | -101                                |
| <b>Z1</b><br><b>Z4</b>              | <b>+2</b> | 5'-G <u>Z</u> G ATA TGC<br>3'-CAC <u>Z</u> AT ACG  | -288±6 [+18]                             | -326±16 [-20]       | -218±5 [+88]        | -90                                 |
| <b>Z2</b><br><b>Z5</b>              | <b>+1</b> | 5'-GTG A <u>Z</u> A TGC<br>3'-CAC TAZ <u>Z</u> ACG | <b>-332±2 [-26]</b>                      | <b>-317±7 [-11]</b> | <b>-252±7 [+54]</b> | <b>-91</b>                          |
| <b>Z2</b><br><b>Z4</b>              | <b>-1</b> | 5'-GTG A <u>Z</u> A TGC<br>3'-CAC <u>Z</u> AT ACG  | -332±2 [-26]                             | -326±16 [-20]       | -235±8 [+71]        | -117                                |
| <b>Z3</b><br><b>Z5</b>              | <b>-1</b> | 5'-GTG ATA <u>Z</u> GC<br>3'-CAC TAZ <u>Z</u> ACG  | -297±4 [+9]                              | -317±7 [-11]        | -166±8 [+140]       | -142                                |
| <b>Z3</b><br><b>Z4</b>              | <b>-3</b> | 5'-GTG ATA <u>Z</u> GC<br>3'-CAC <u>Z</u> AT ACG   | -297±4 [+9]                              | -326±16 [-20]       | -250±6 [+56]        | -67                                 |

<sup>a</sup>  $\Delta\Delta H$  is measured relative to  $\Delta H$  for **D1:D2** = -306 kJ/mol.  $\Delta H_{\text{rec}} = \Delta H$  (upper ON vs cDNA) +  $\Delta H$  (lower ON vs cDNA) -  $\Delta H$  (probe duplex) -  $\Delta H$  (dsDNA target). “±” denotes standard deviation. <sup>b</sup> Data from reference S2 shown to facilitate comparison.

**Table S5.** Entropy change at 293K upon duplex formation ( $-T^{293}\Delta S$ ) and probe recognition of isosequential dsDNA target **D1:D2** ( $-T^{293}\Delta S_{\text{rec}}$ ).<sup>a</sup>

| ON                                  | ZP        | Sequence                                          | $-T^{293}\Delta S [\Delta(T^{293}\Delta S)]$ (kJ/mol) |                     |                    | $-T^{293}\Delta S_{\text{rec}}$<br>(kJ/mol) |
|-------------------------------------|-----------|---------------------------------------------------|-------------------------------------------------------|---------------------|--------------------|---------------------------------------------|
|                                     |           |                                                   | upper ON<br>vs cDNA                                   | lower ON<br>vs cDNA | probe<br>duplex    |                                             |
| <b>X1</b><br><b>X5</b>              | <b>+4</b> | 5'-G <u>X</u> G ATA TGC<br>3'-CAC TAx ACg         | 259±2 [-6]                                            | 301±3 [+36]         | 220±2 [-45]        | +75                                         |
| <b>X1</b><br><b>X4</b>              | <b>+2</b> | 5'-G <u>X</u> G ATA TGC<br>3'-CAC <u>X</u> AT ACg | 259±2 [-6]                                            | 274±3 [+9]          | 217±1 [-48]        | +51                                         |
| <b>X2</b><br><b>X5</b>              | <b>+1</b> | 5'-GTG A <u>X</u> A TGC<br>3'-CAC TAx ACg         | <b>301±2 [+36]</b>                                    | <b>301±3 [+36]</b>  | <b>225±2 [-40]</b> | <b>+112</b>                                 |
| <b>X2</b><br><b>X4</b>              | <b>-1</b> | 5'-GTG A <u>X</u> A TGC<br>3'-CAC <u>X</u> AT ACg | 301±2 [+36]                                           | 274±3 [+9]          | 232±3 [-33]        | +78                                         |
| <b>X3</b><br><b>X5</b>              | <b>-1</b> | 5'-GTG ATA <u>X</u> GC<br>3'-CAC TAx ACg          | 230±3 [-35]                                           | 301±3 [+36]         | 174±6 [-91]        | +92                                         |
| <b>X3</b><br><b>X4</b>              | <b>-3</b> | 5'-GTG ATA <u>X</u> GC<br>3'-CAC <u>X</u> AT ACg  | 230±3 [-35]                                           | 274±3 [+9]          | 254±5 [-11]        | -15                                         |
| <sup>b</sup> <b>Y1</b><br><b>Y5</b> | <b>+4</b> | 5'-G <u>Y</u> G ATA TGC<br>3'-CAC TAY ACg         | 235±3 [-30]                                           | 247±6 [-18]         | 224±1 [-41]        | -7                                          |
| <sup>b</sup> <b>Y1</b><br><b>Y4</b> | <b>+2</b> | 5'-G <u>Y</u> G ATA TGC<br>3'-CAC <u>Y</u> AT ACg | 235±3 [-30]                                           | 254±6 [-11]         | 203±8 [-62]        | +21                                         |
| <sup>b</sup> <b>Y2</b><br><b>Y5</b> | <b>+1</b> | 5'-GTG A <u>Y</u> A TGC<br>3'-CAC TAY ACg         | <b>251±1 [-14]</b>                                    | <b>247±6 [-18]</b>  | <b>204±3 [-61]</b> | <b>+29</b>                                  |
| <sup>b</sup> <b>Y2</b><br><b>Y4</b> | <b>-1</b> | 5'-GTG A <u>Y</u> A TGC<br>3'-CAC <u>Y</u> AT ACg | 251±1 [-14]                                           | 254±6 [-11]         | 245±5 [-20]        | -5                                          |
| <sup>b</sup> <b>Y3</b><br><b>Y5</b> | <b>-1</b> | 5'-GTG ATA <u>Y</u> GC<br>3'-CAC TAY ACg          | 220±7 [-45]                                           | 247±6 [-18]         | 225±5 [-40]        | -23                                         |
| <sup>b</sup> <b>Y3</b><br><b>Y4</b> | <b>-3</b> | 5'-GTG ATA <u>Y</u> GC<br>3'-CAC <u>Y</u> AT ACg  | 220±7 [-45]                                           | 254±6 [-11]         | 256±3 [-9]         | -47                                         |
| <b>Z1</b><br><b>Z5</b>              | <b>+4</b> | 5'-G <u>Z</u> G ATA TGC<br>3'-CAC TAZ ACg         | 243±5 [-22]                                           | 258±6 [-7]          | 146±4 [-119]       | +90                                         |
| <b>Z1</b><br><b>Z4</b>              | <b>+2</b> | 5'-G <u>Z</u> G ATA TGC<br>3'-CAC <u>Z</u> AT ACg | 243±5 [-22]                                           | 275±15 [+10]        | 167±4 [-98]        | +86                                         |
| <b>Z2</b><br><b>Z5</b>              | <b>+1</b> | 5'-GTG A <u>Z</u> A TGC<br>3'-CAC TAZ ACg         | <b>271±2 [+6]</b>                                     | <b>258±6 [-7]</b>   | <b>201±7 [-64]</b> | <b>+63</b>                                  |
| <b>Z2</b><br><b>Z4</b>              | <b>-1</b> | 5'-GTG A <u>Z</u> A TGC<br>3'-CAC <u>Z</u> AT ACg | 271±2 [+6]                                            | 275±15 [+10]        | 178±7 [-87]        | +103                                        |
| <b>Z3</b><br><b>Z5</b>              | <b>-1</b> | 5'-GTG ATA <u>Z</u> GC<br>3'-CAC TAZ ACg          | 244±4 [-21]                                           | 258±6 [-7]          | 116±8 [-149]       | +121                                        |
| <b>Z3</b><br><b>Z4</b>              | <b>-3</b> | 5'-GTG ATA <u>Z</u> GC<br>3'-CAC <u>Z</u> AT ACg  | 244±4 [-21]                                           | 275±15 [+10]        | 196±6 [-69]        | +58                                         |

<sup>a</sup>  $\Delta(T^{293}\Delta S)$  is measured relative to  $-T^{293}\Delta S$  for **D1:D2** = 265 kJ/mol.  $-T^{293}\Delta S_{\text{rec}} = T^{293}\Delta S$  (upper strand vs cDNA) +  $T^{293}\Delta S$  (lower strand vs cDNA) -  $T^{293}\Delta S$  (probe duplex) -  $T^{293}\Delta S$  (dsDNA target). “±” denotes standard deviation. <sup>b</sup> Data from reference S2 shown to facilitate comparison.

## References

- S1) S. Karmakar, B. A. Anderson, R. L. Rathje, S. Andersen, T. B. Jensen, P. E. Nielsen and P. J. Hrdlicka, *J. Org. Chem.*, 2011, **76**, 7119-7131.
- S2) S. Karmakar, A. S. Madsen, D. C. Guenther, B. C. Gibbons and P. J. Hrdlicka, *Org. Biomol. Chem.*, 2014, **12**, 7758-7773.

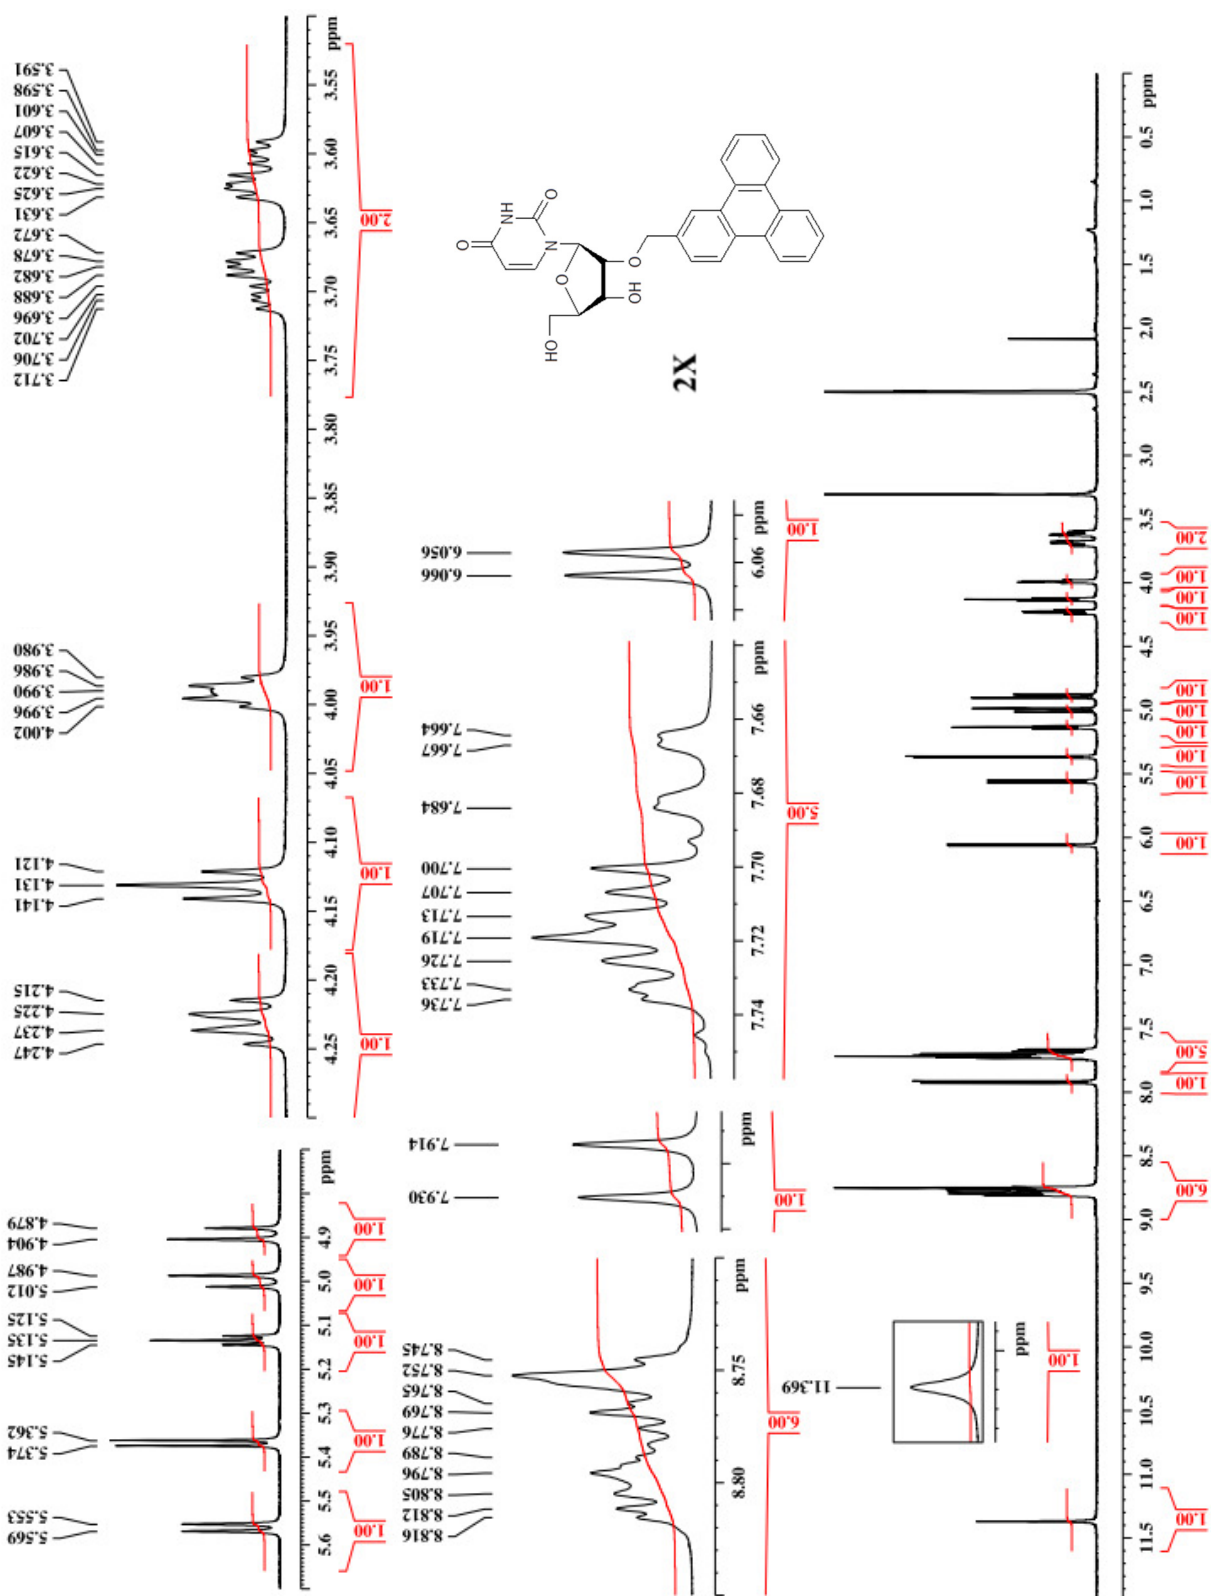

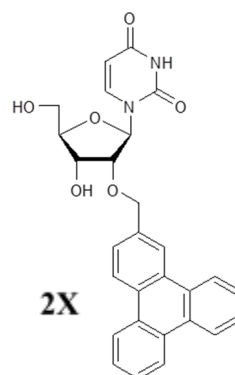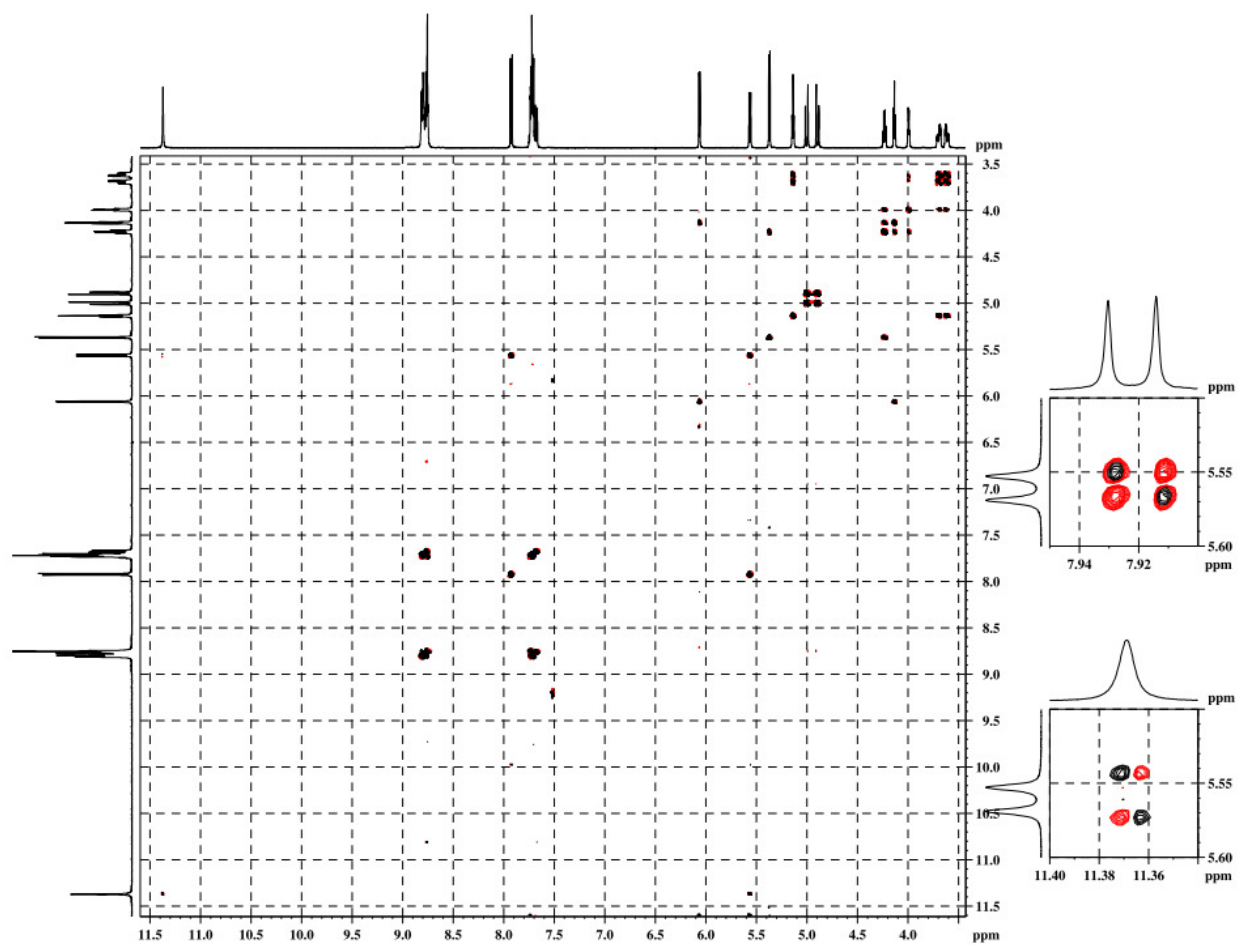

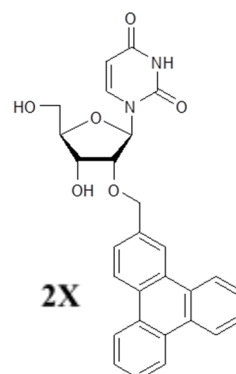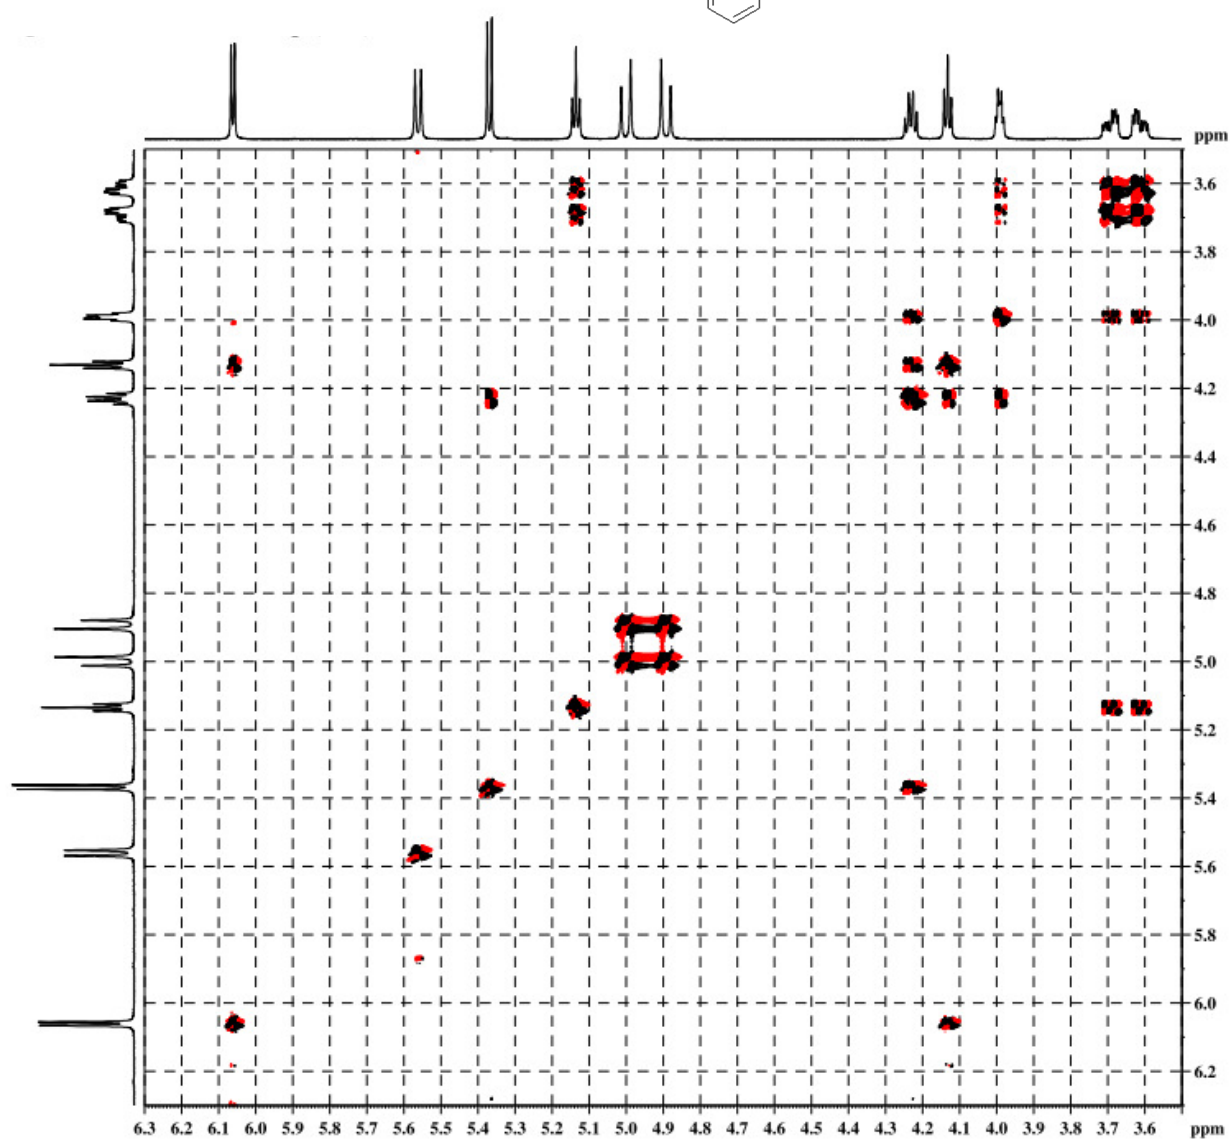

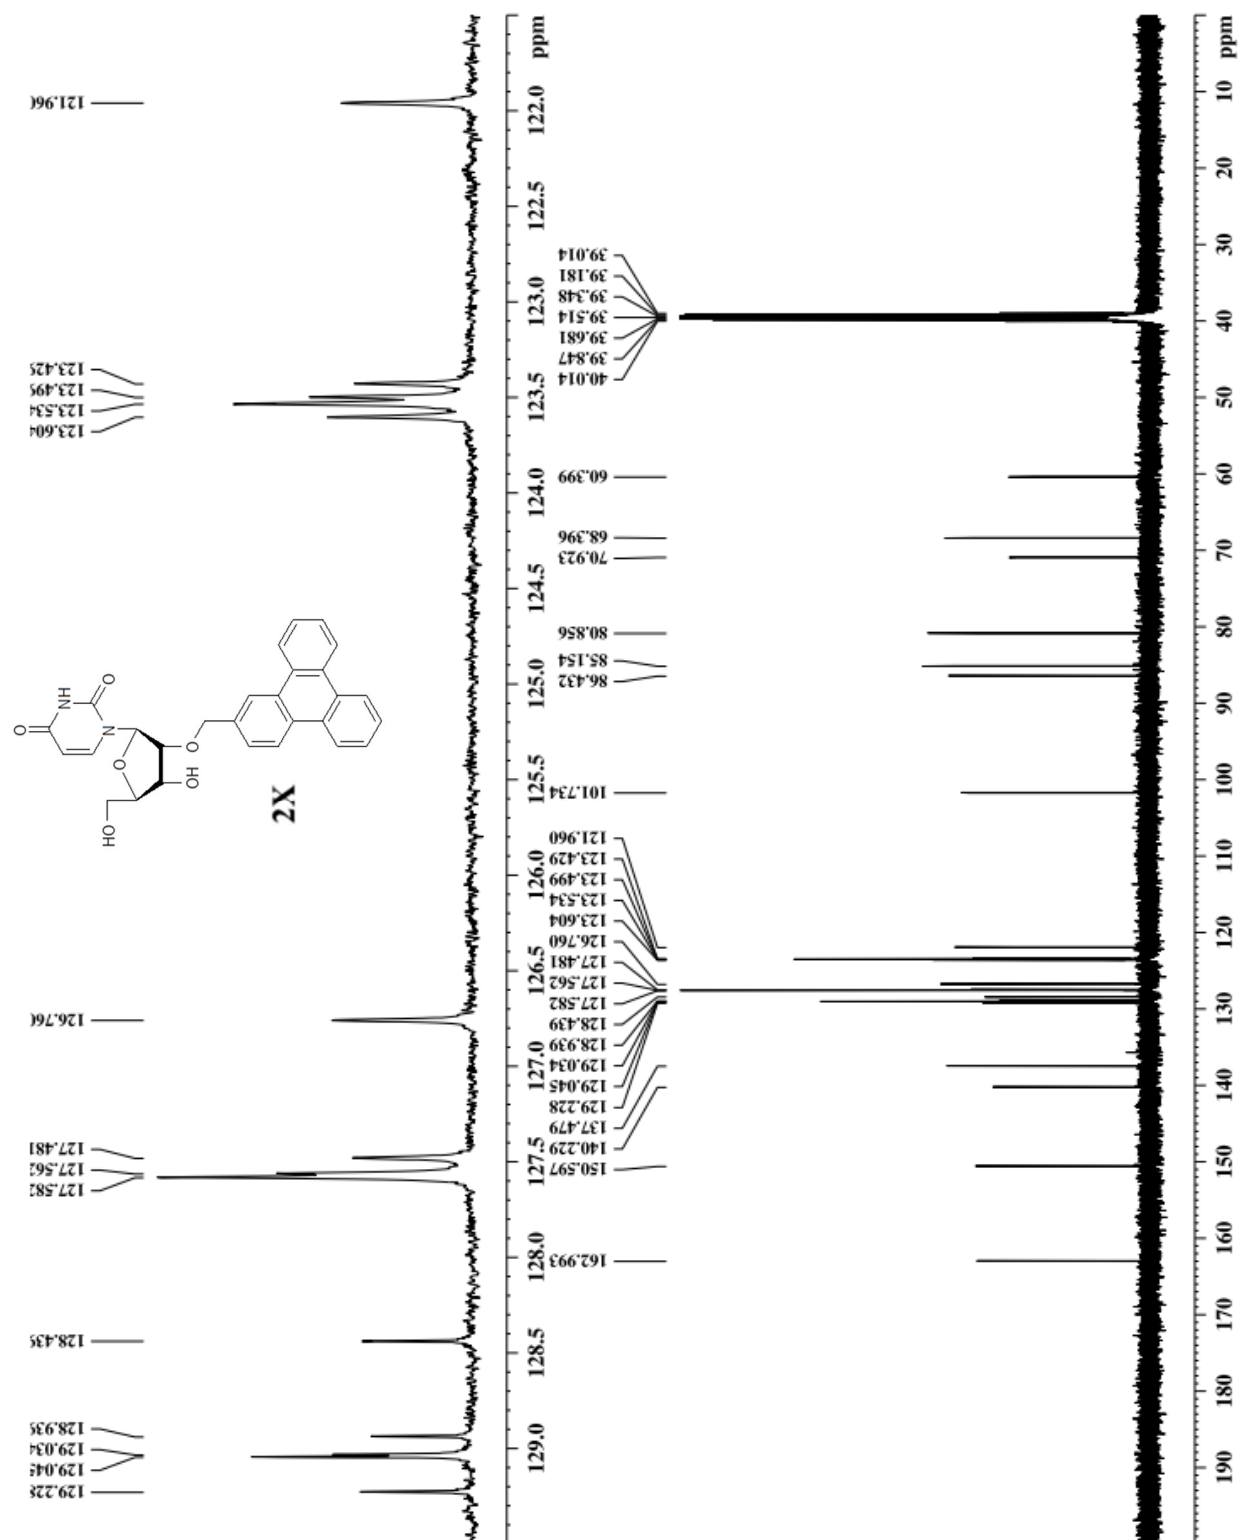

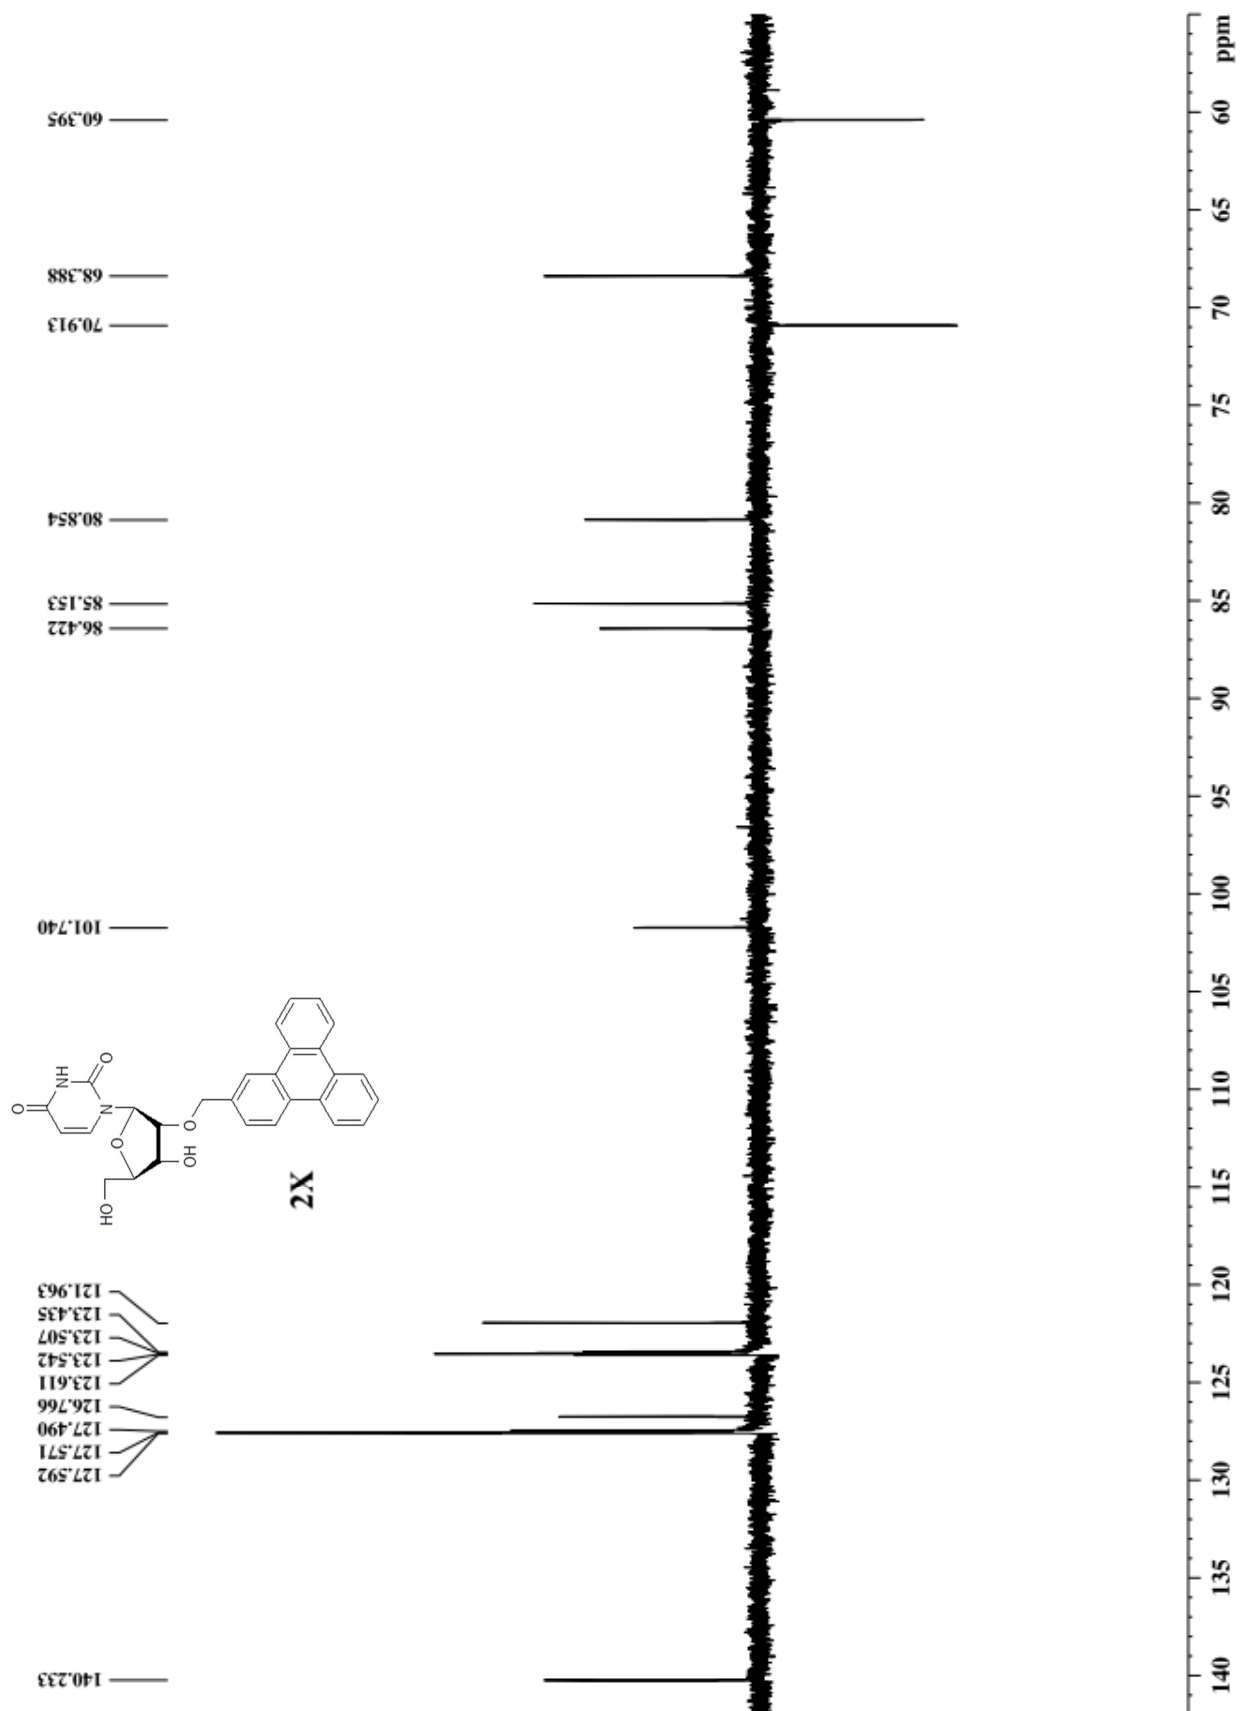

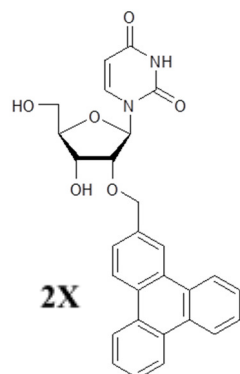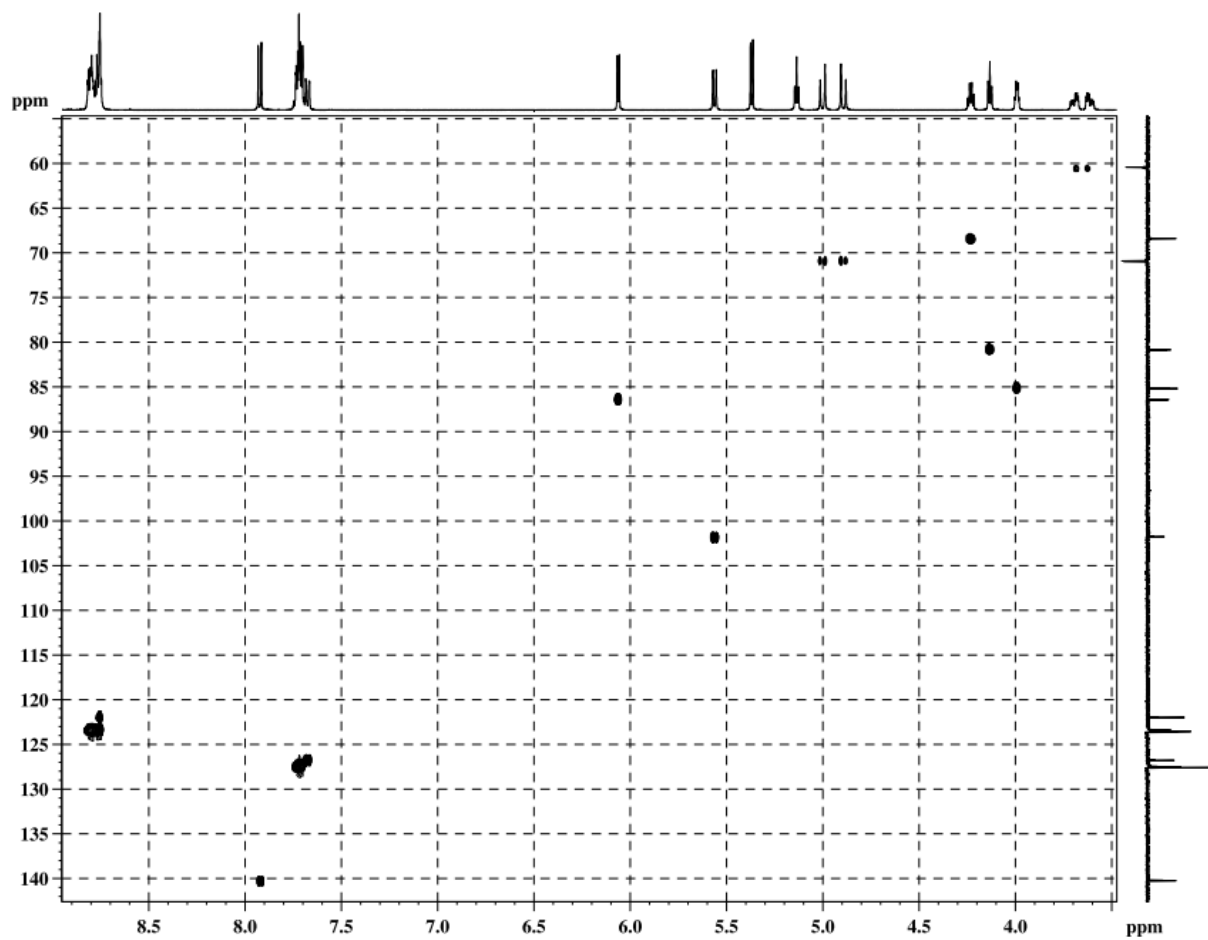

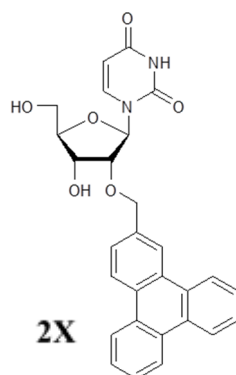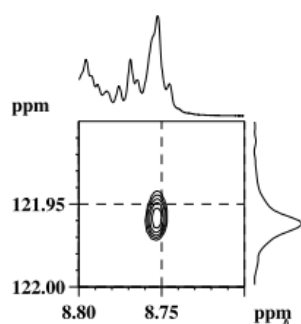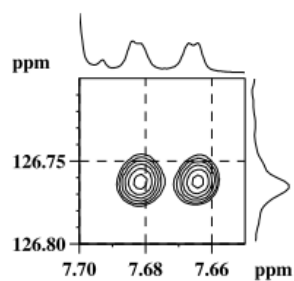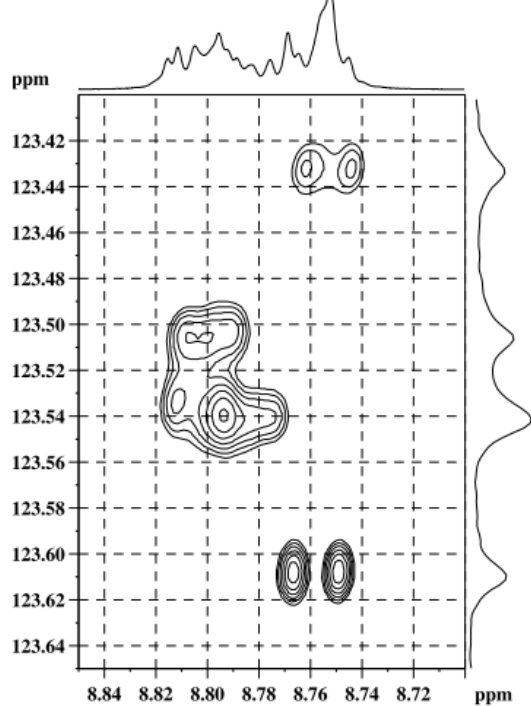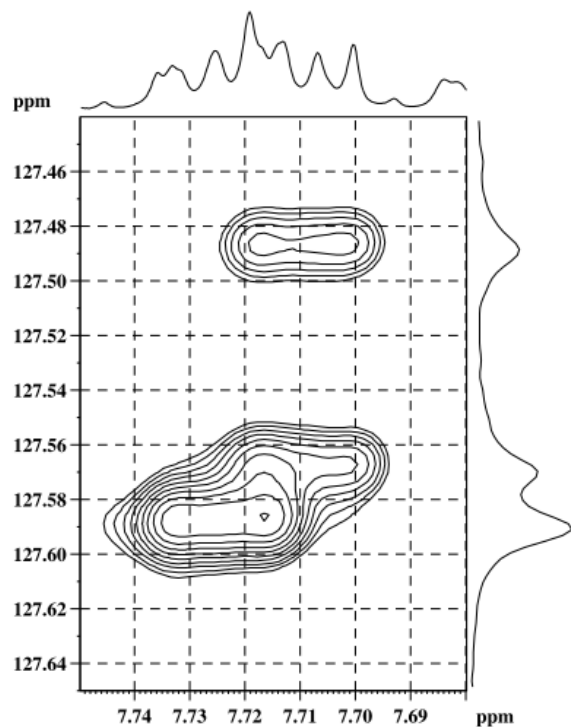

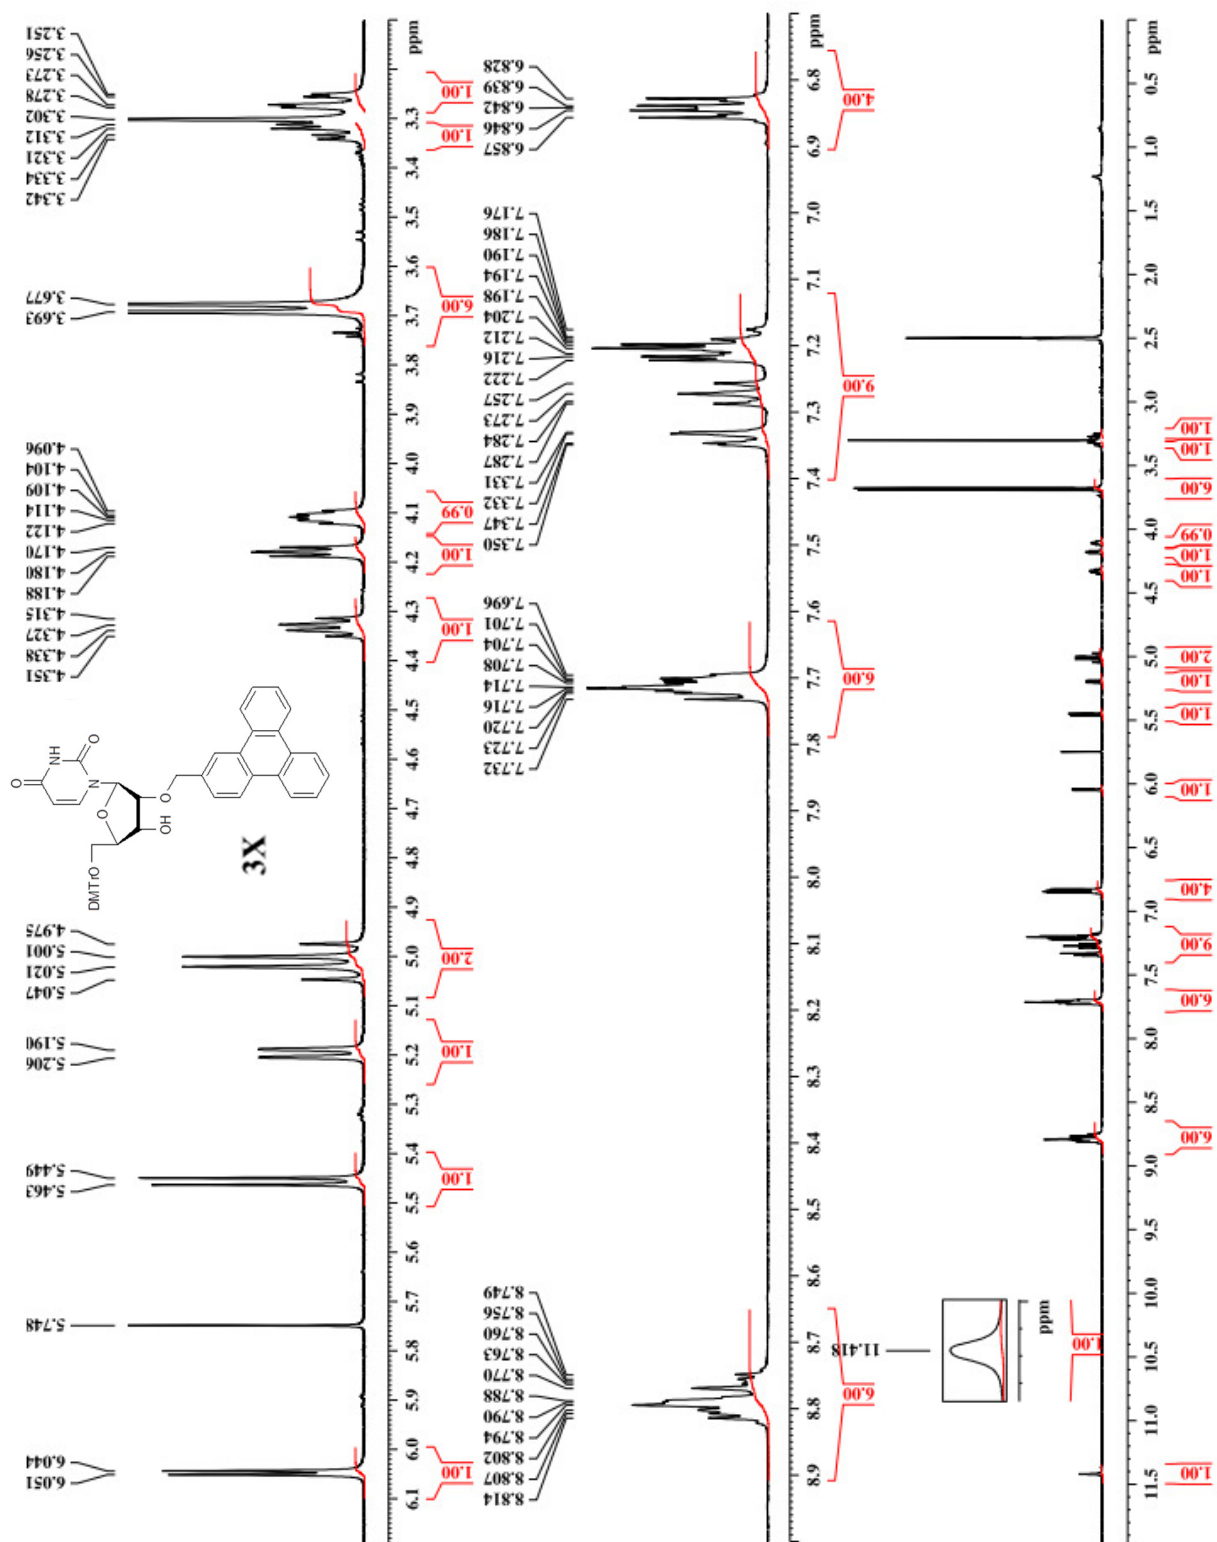

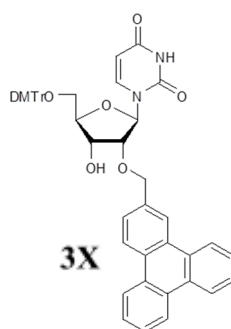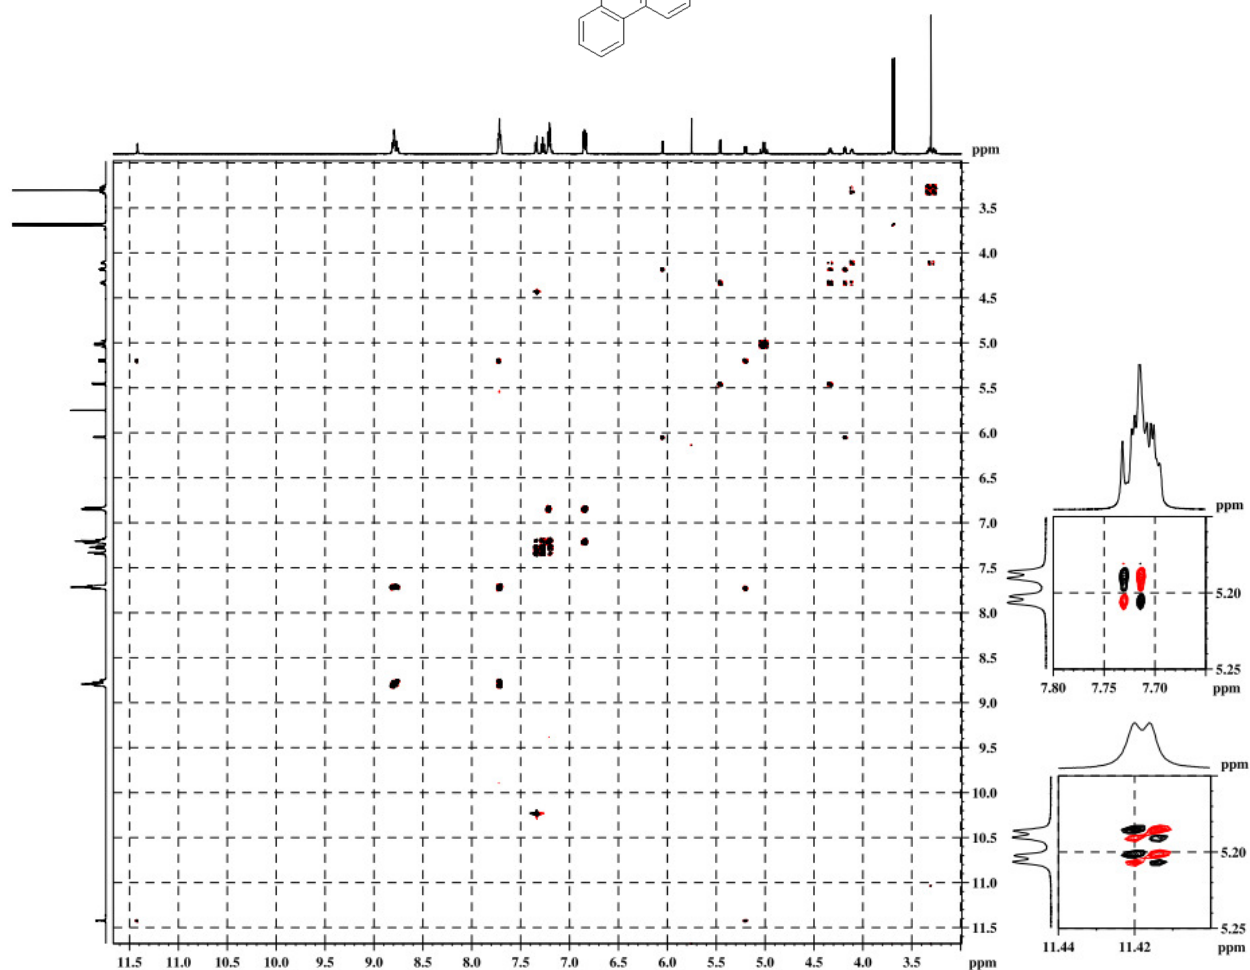

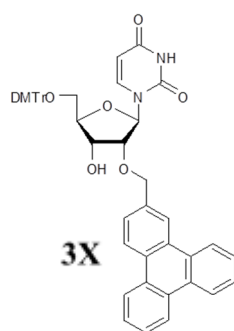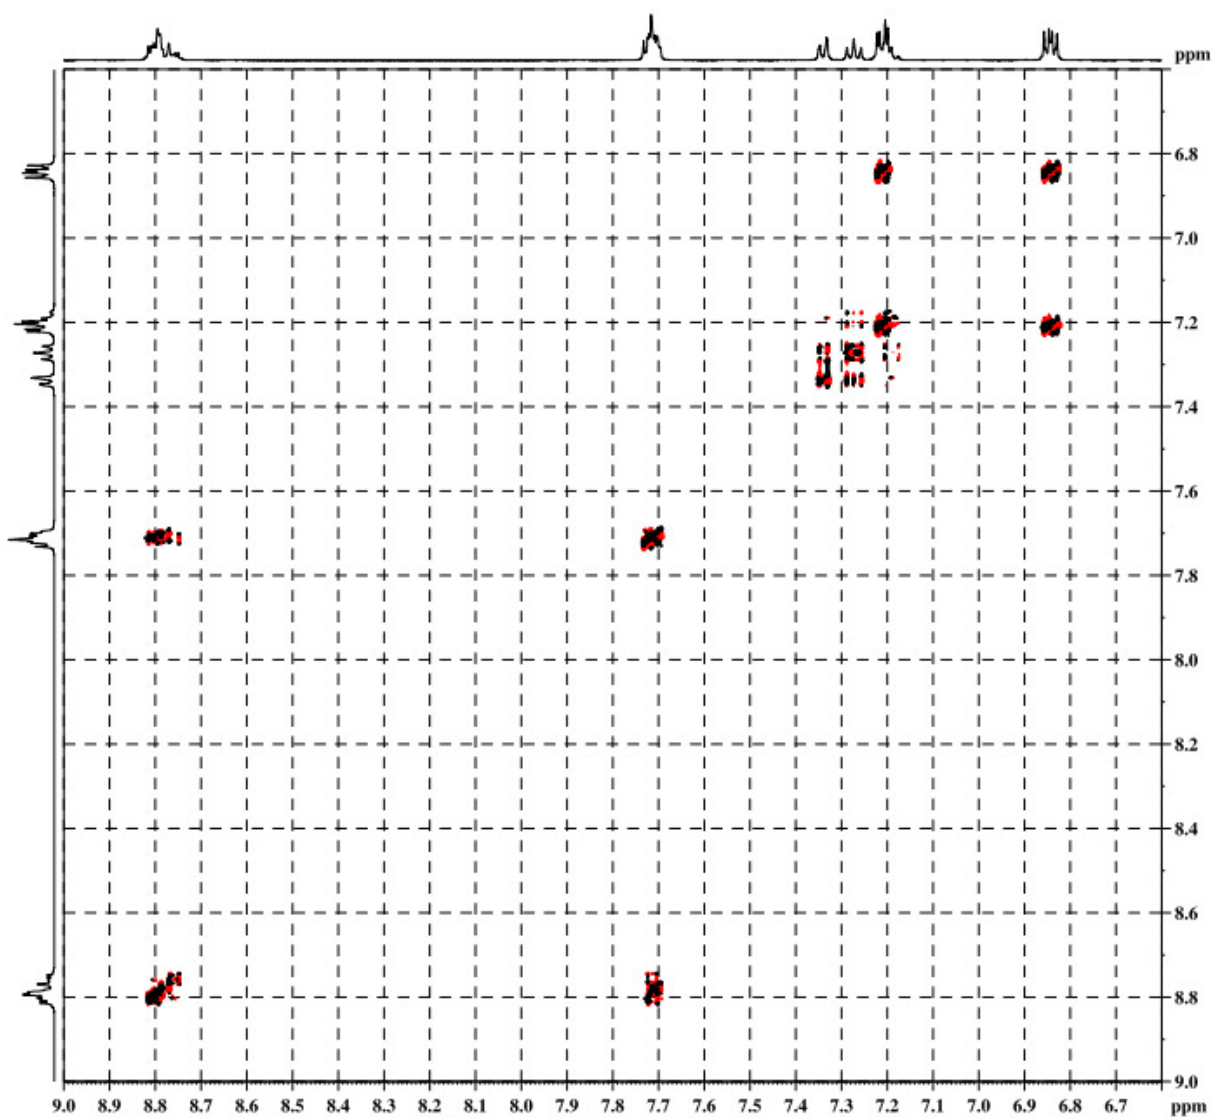

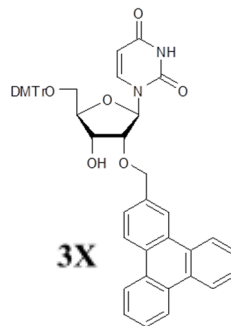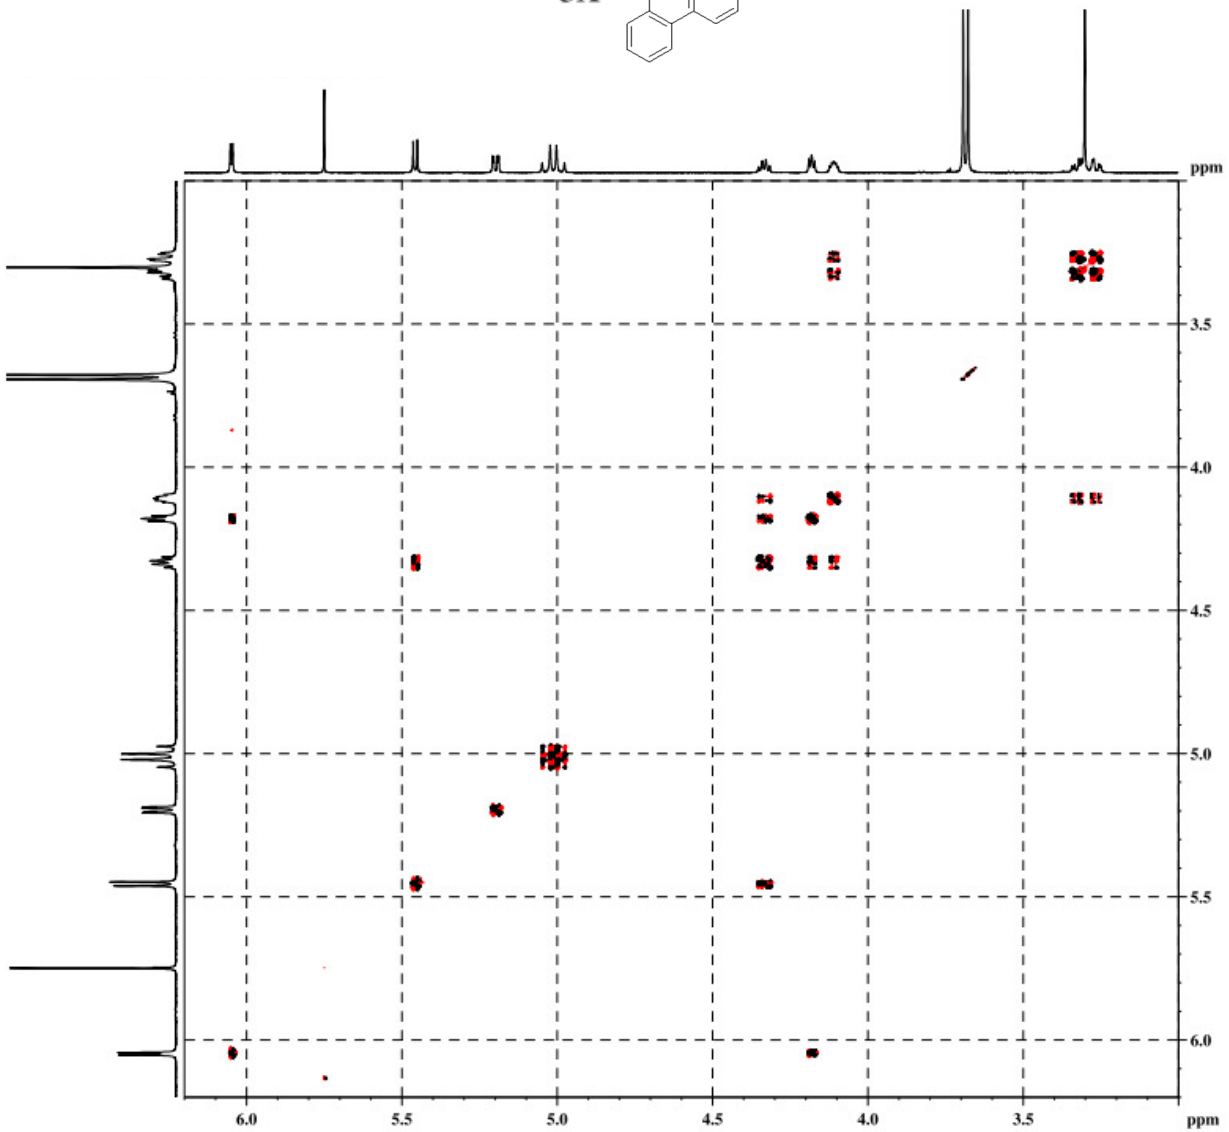

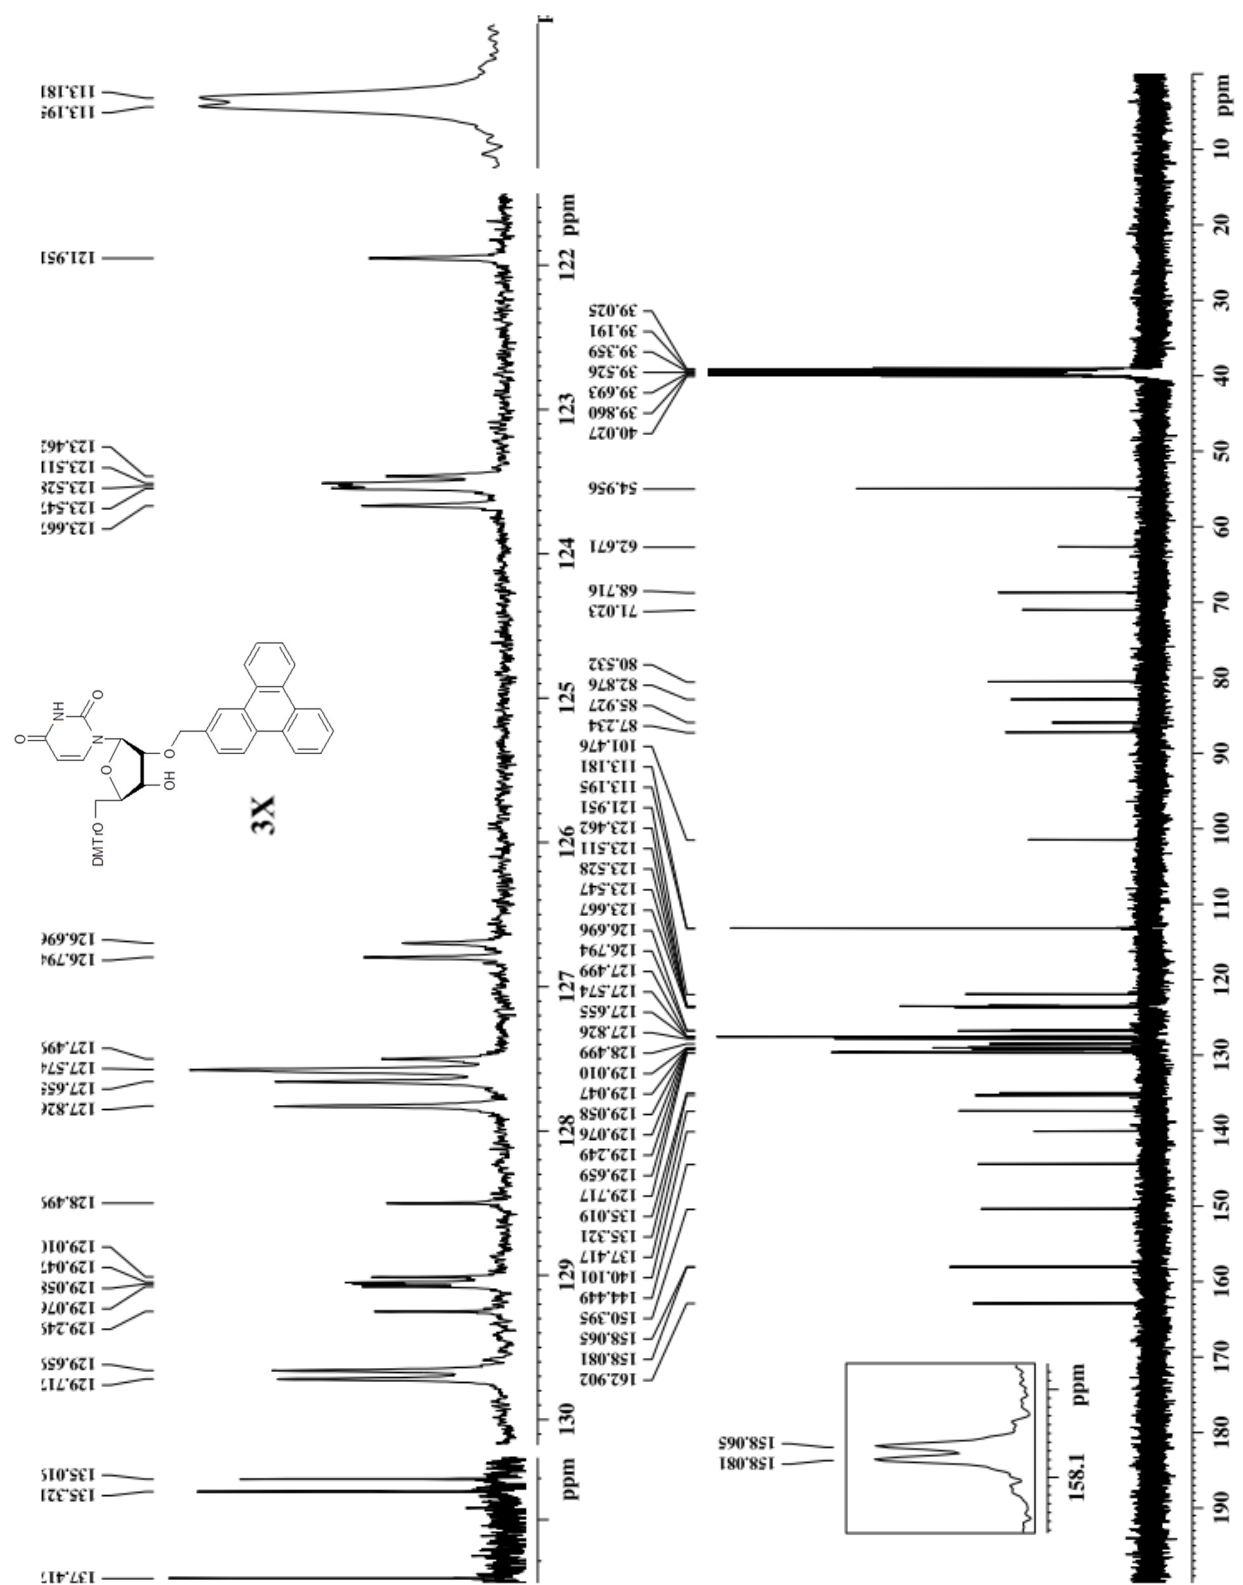

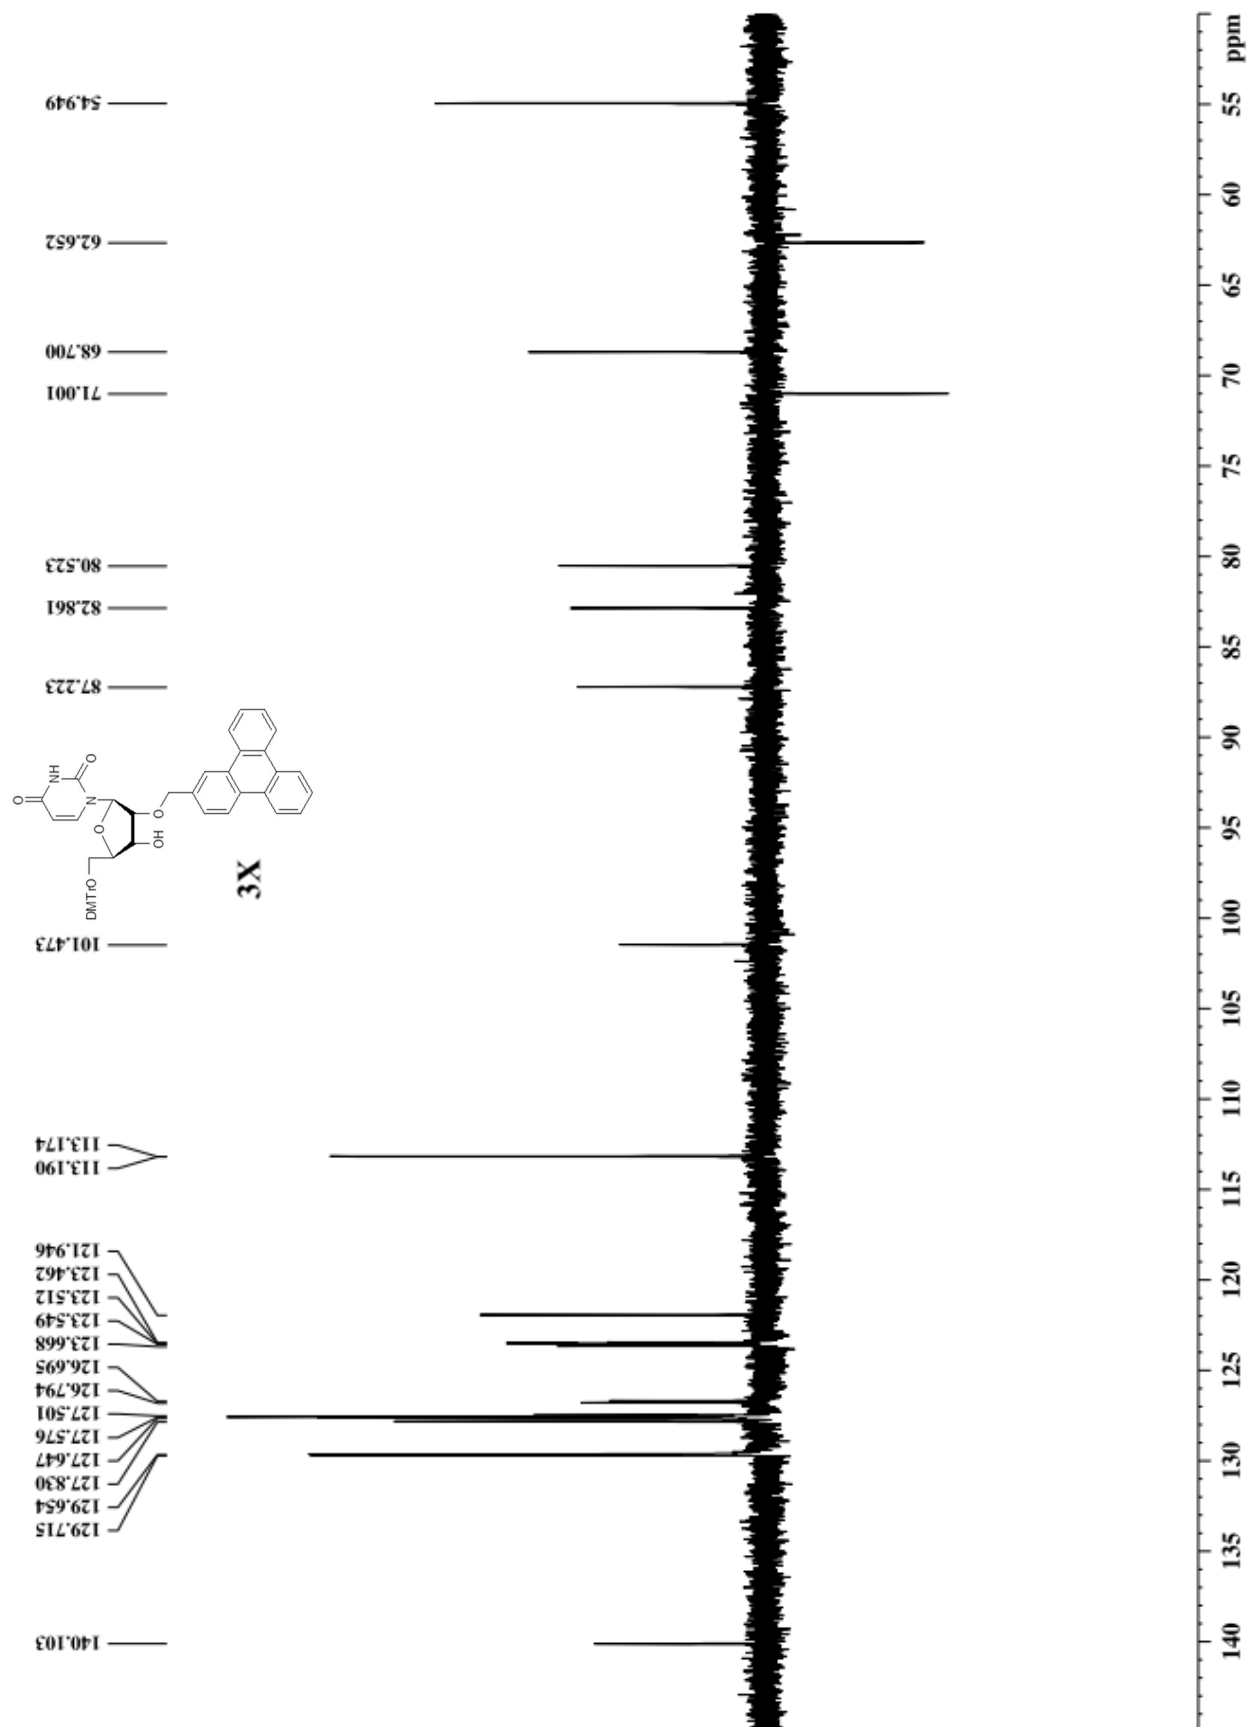

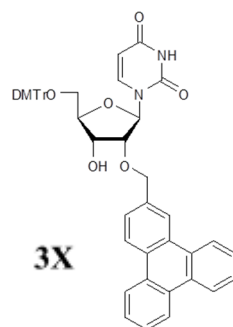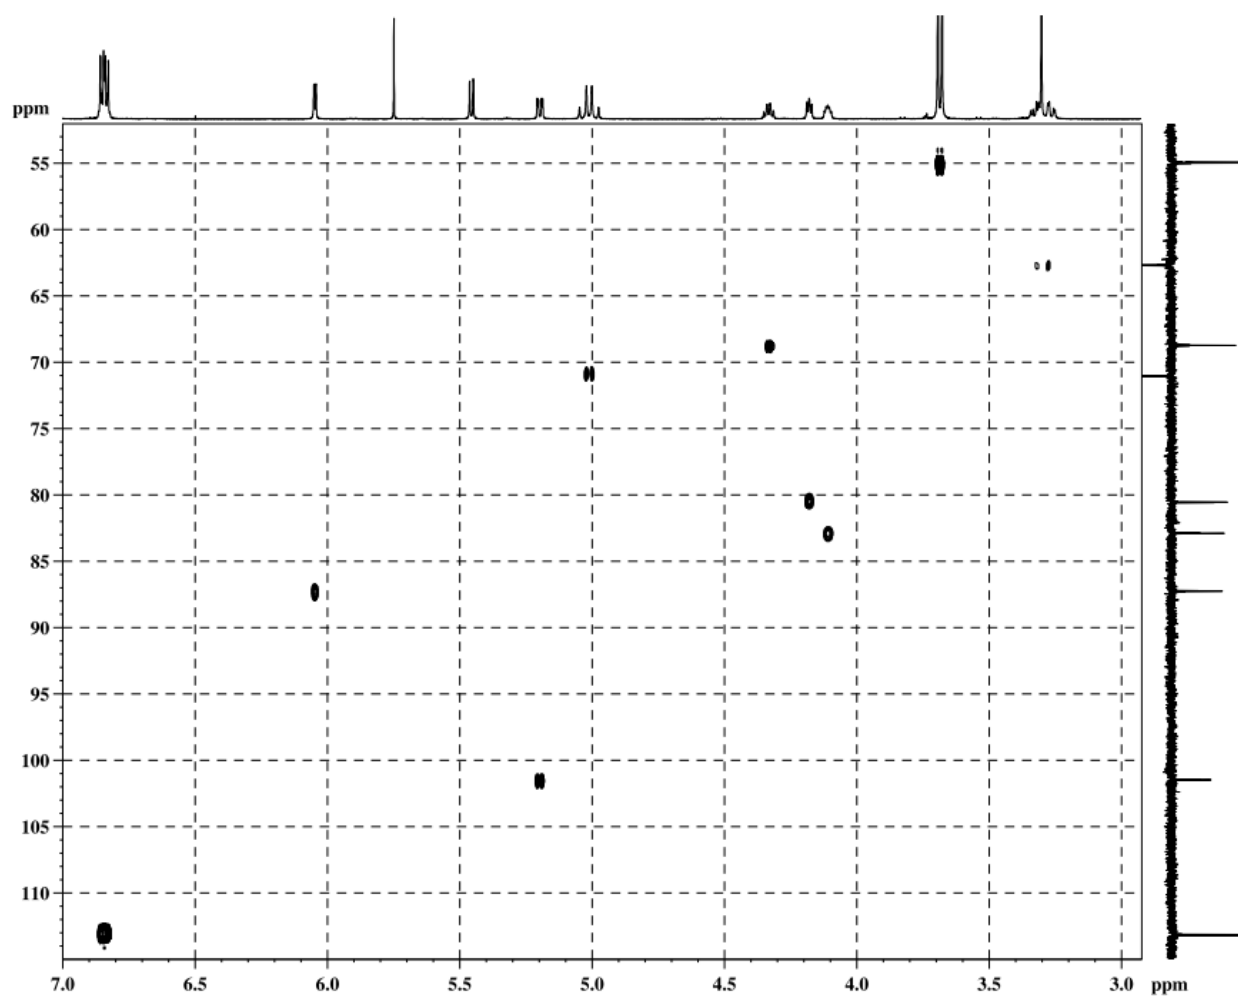

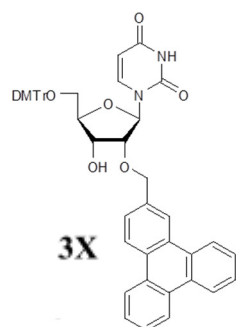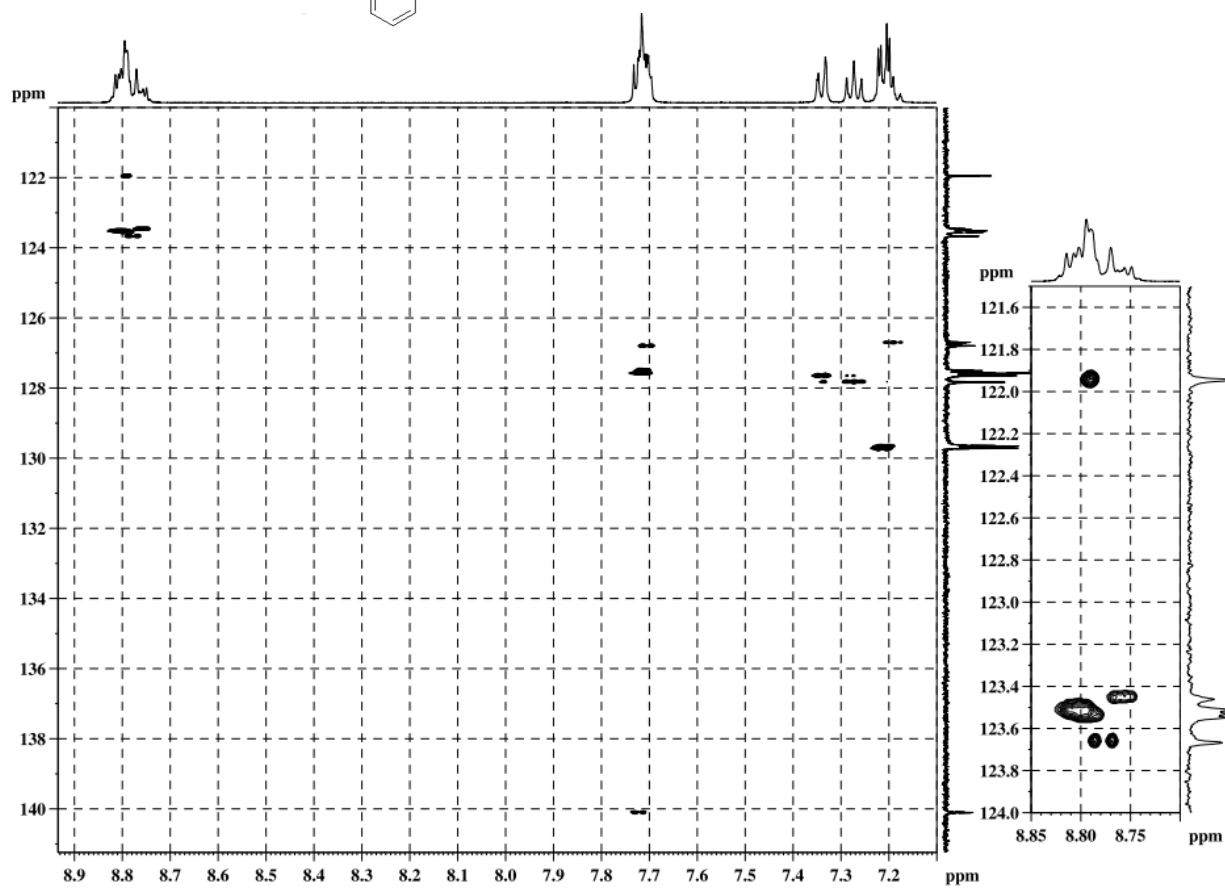

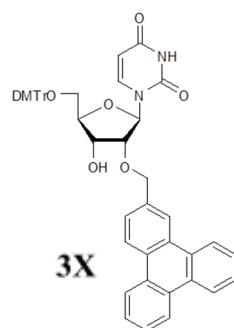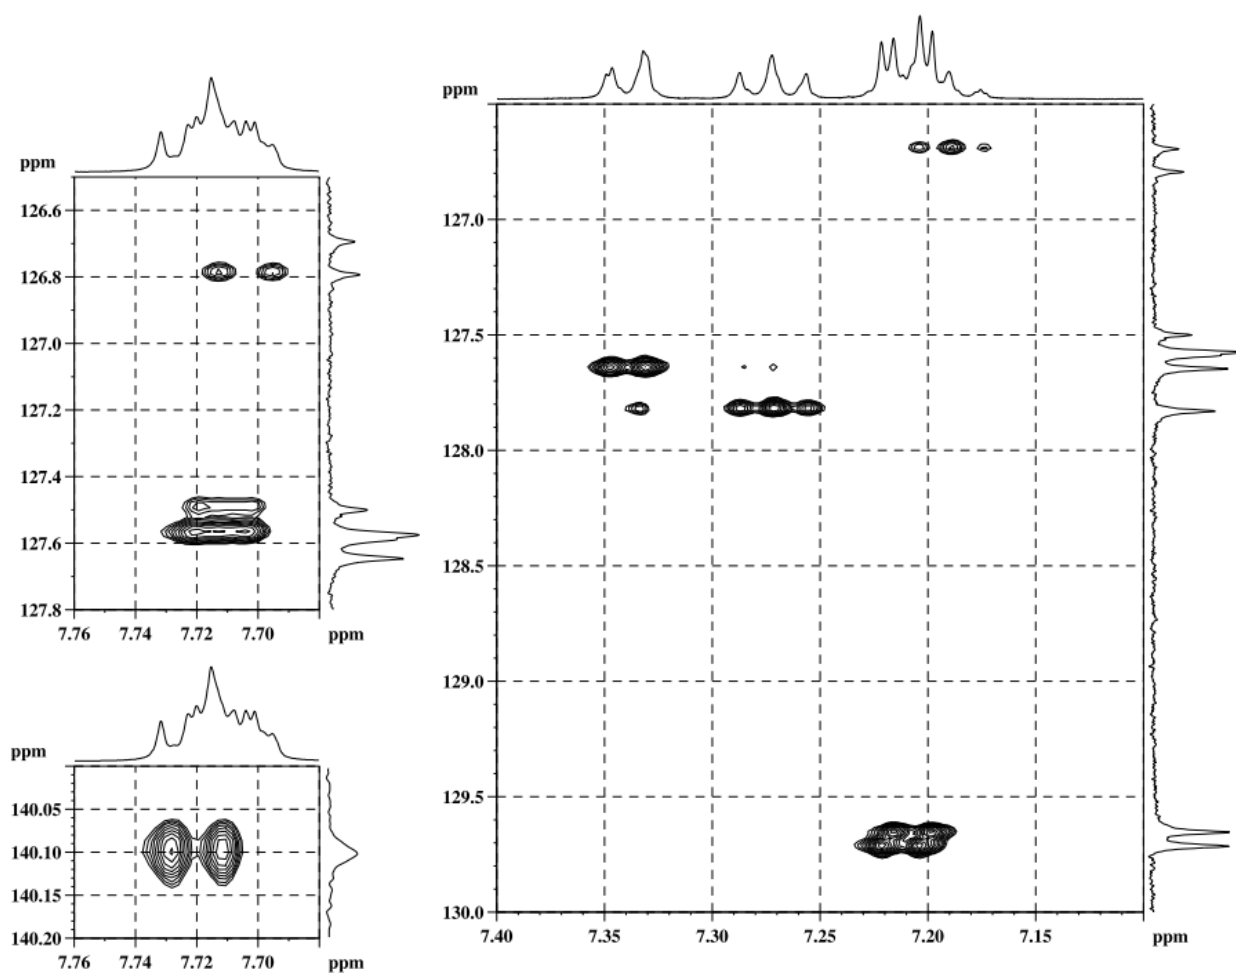

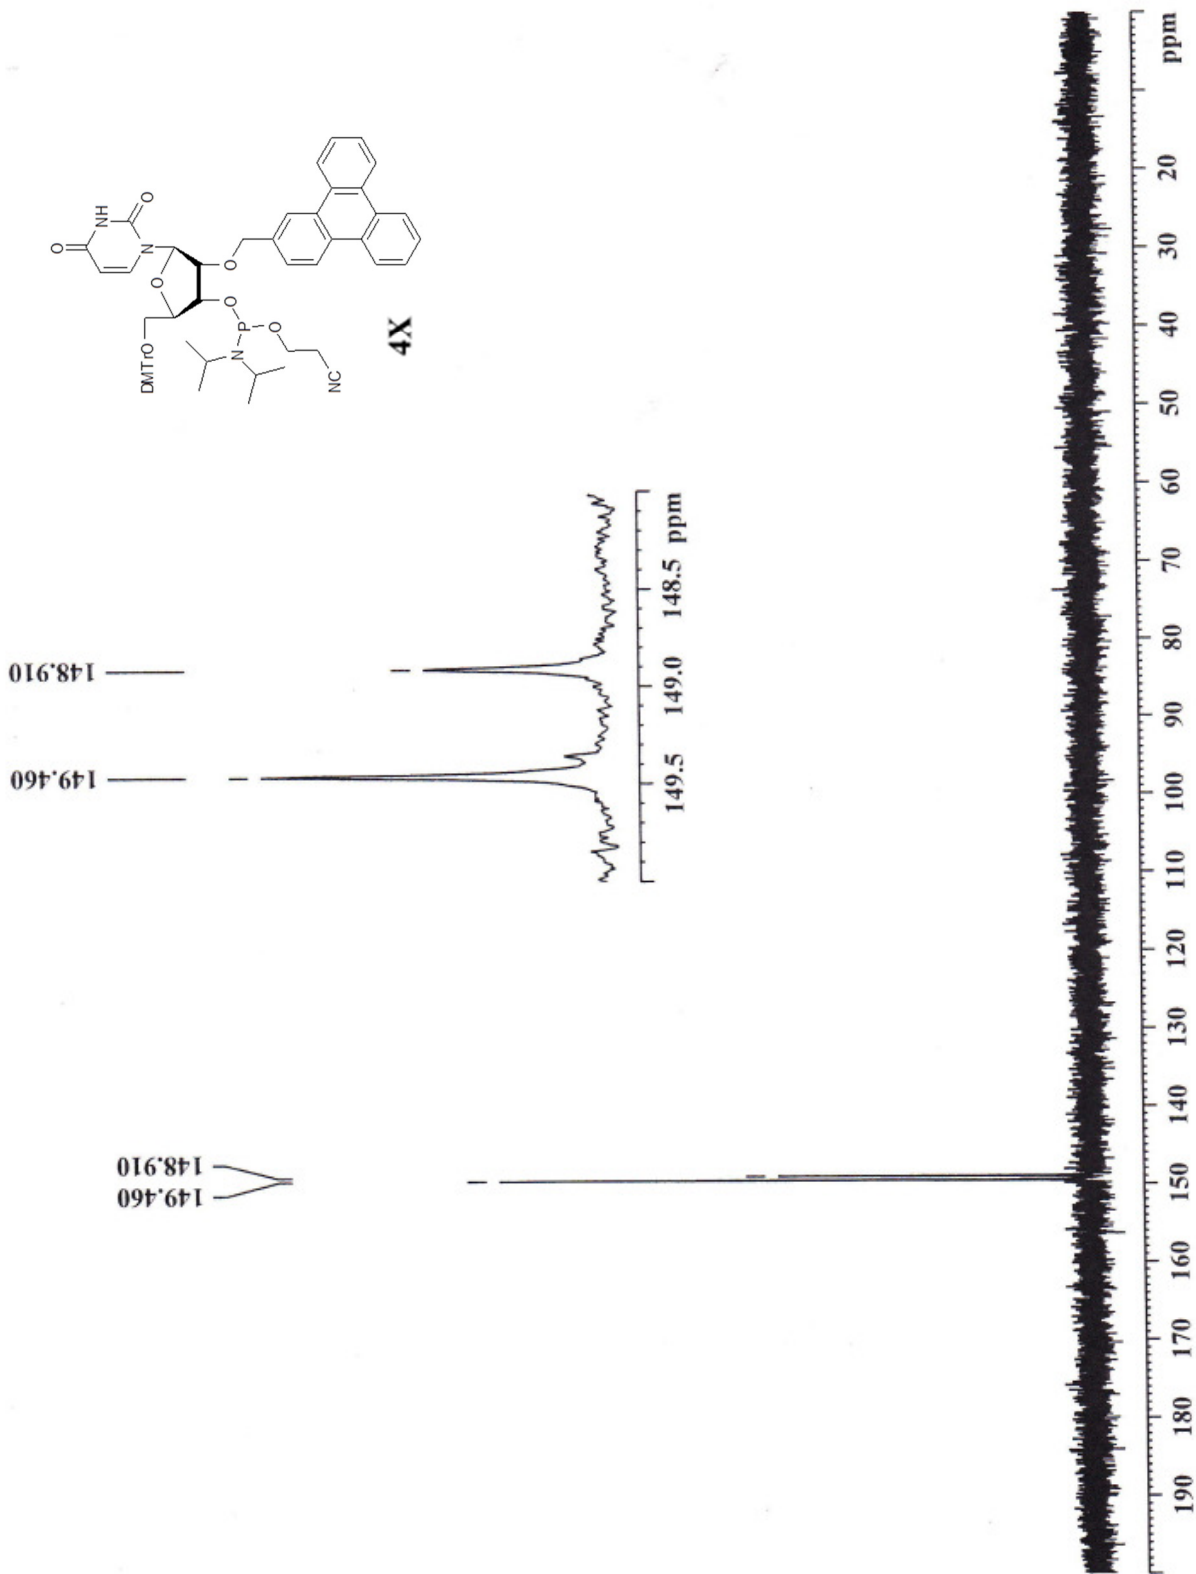

Supplement: c7ob01920c1.pdf [file c7ob01920c1.pdf]
